1 **Title:** Neurotrophic control of size regulation during axolotl limb regeneration

2 **Authors:** Kaylee M. Wells-Enright, Kristina Kelley, Mary Baumel, Warren A. Vieira, Catherine D.

3 McCusker

4

5 **Affiliations:** Biology Department, University of Massachusetts Boston, Boston, MA

6 **Keywords:** Limb regeneration; size regulation; nerve signaling

7 **Abstract:**

8 The mechanisms that regulate the sizing of the regenerating limb in tetrapods such as the  
9 Mexican axolotl are unknown. Upon the completion of the developmental stages of regeneration,  
10 when the regenerative organ known as the blastema completes patterning and differentiation, the  
11 limb regenerate is proportionally small in size. It then undergoes a phase of regeneration that we  
12 have called the “tiny-limb” stage, that is defined by rapid growth until the regenerate reaches the  
13 proportionally appropriate size. In the current study we have characterized this growth and have  
14 found that signaling from the limb nerves is required for its maintenance. Using the regenerative  
15 assay known as the Accessory Limb Model, we have found that the size of the limb can be  
16 positively and negatively manipulated by nerve abundance. We have additionally developed a  
17 new regenerative assay called the Neural Modified-ALM (NM-ALM), which decouples the source  
18 of the nerve from the regenerating host environment. Using the NM-ALM we discovered that non-  
19 neural extrinsic factors from differently sized host animals do not play a prominent role in  
20 determining the size of the regenerating limb. We have also discovered that the regulation of limb  
21 size is not autonomously regulated by the limb nerves. Together, these observations show that  
22 the limb nerves provide essential and instructive cues to regulate the final size of the regenerating  
23 limb.

24

25 **Introduction:**

26 It is estimated that over 2.1 million Americans are living with limb loss or limb difference,

27 which has profound effects on the function, health, and quality of life in these patients (Ziegler-  
28 Graham, MacKenzie, Ephraim, Trivison, & Brookmeyer, 2008). The long-term goal of  
29 regenerative medicine is to replace or repair damaged limbs by inducing endogenous  
30 regenerative responses in humans. Studies in tetrapods capable of regenerating complete and  
31 functional limb structures, such as the Mexican axolotl (*Ambystoma mexicanum*), have been  
32 invaluable in terms of understanding the basic underlying biology of limb regeneration and the  
33 mechanisms that control this process. Much research in the axolotl system has focused on the  
34 essential aspects of the initial stages of regeneration; how the regeneration permissive  
35 environment is established, how mature limb cells become regeneration competent, and how the  
36 unique pattern of the regenerated limb structures is generated. However, to date, very little is  
37 known about the later stages of regeneration that are required for the regenerating structure to  
38 mature into a fully functional limb.

39         One key occurrence at the later stages of limb regeneration is the growth of the limb  
40 regenerate to the size that is proportionally appropriate to the rest of the animal. Upon the  
41 completion of the developmental stages of regeneration when, the regenerative organ known as  
42 the blastema forms, patterns, and differentiates into the missing limb tissues, a proportionally  
43 small limb is generated. The regenerated limb then grows rapidly until it reaches a size that is  
44 proportionally appropriate to the body length of the animal. Axolotl are an indefinitely growing  
45 species, and thus the dimensions of the regenerated limb are different from those at the time of  
46 the initial injury. This means that size and proportionality must be regulated throughout  
47 regeneration, as opposed to determined at the onset of the process. This is reassuring for the  
48 prospect of regenerating limbs on humans, where the difference in the size of the developing  
49 compared to the adult limb structure is very large, and the dimensions of the limbs depend greatly  
50 on the individual and stage of human maturation (Bogin & Varela-Silva, 2010; Fredriks et al.,  
51 2005). However, the mechanisms regulating size and growth during axolotl limb regeneration are

52 largely unknown. Understanding these mechanisms in the axolotl will provide key insight into how  
53 a fully functional regenerate can be generated on human patients.

54 Our limited knowledge of how limb size is regulated is based on historic studies by  
55 Harrison and Twitty, who cross-transplanted limb buds from the embryos of differently sized  
56 salamander species to determine whether size is instructed by tissue autonomous (intrinsic) or  
57 non-autonomous (extrinsic) mechanisms (Harrison, 1924; Twitty & Schwind, 1931). These  
58 experiments revealed that both intrinsic and extrinsic factors provide instructive cues to the  
59 developing limb bud. More recently, Bryant et al. was able to decouple axolotl limb size from body  
60 size through repeated removal of the limb bud (2017). When the limb buds were allowed to  
61 regenerate and develop into a limb, they generated permanently miniaturized limbs (D. M. Bryant  
62 et al., 2017). Thus, manipulations to the embryonic limb bud can both positively and negatively  
63 affect the overall size of the limb on adult salamanders. The factors that regulate tetrapod limb  
64 size during embryogenesis, and whether they are reutilized in regenerating limbs, are not known.

65 Correlations between innervation abundance and limb size are apparent in humans and  
66 amphibians (Bain et al., 2012; D. M. Bryant et al., 2017; Frykman & Wood, 1978; Mullen, Bryant,  
67 Torok, Blumberg, & Gardiner, 1996; Singer, 1978; Tsuge & Ikuta, 1973). In humans, damage to  
68 the limb nerves during birth results in impaired limb growth and size, which can be alleviated by  
69 surgical repair of the nerves (Bain et al., 2012). Additionally, the presence of neurofibromas in  
70 human arms or hands, which increases the abundance of neural signals, results in the formation  
71 of proportionally large digits (Tsuge & Ikuta, 1973; Frykman & Wood, 1978). In axolotls, the  
72 permanently miniaturized axolotl limbs described above exhibit decreased relative innervation (D.  
73 M. Bryant et al., 2017). The role of innervation during the early stages of amphibian limb  
74 regeneration has been well established. Nerve signaling is essential for proliferation in the  
75 blastema, and loss of innervation at early stages of regeneration results in the complete  
76 regenerative failure (Singer, 1978). At the late-bud blastema stage, the loss of nerve signaling  
77 results in the formation of complete, yet miniaturized, limb regenerates (Mullen et al., 1996).

78 Together, these observations indicate that the positive relationship between neural signaling and  
79 limb size is conserved among tetrapods. However, it remains unknown whether the limb nerves  
80 play a supportive or instructive role in growth and sizing of the limb regenerate.

81 In the current study, we have performed the first characterization of growth in late (post-  
82 blastema) staged regenerating limbs of the Mexican axolotl, have identified two post-  
83 developmental growth phases, and have shown that both an increase in cell number and cell size  
84 contribute to growth of the limb during these phases. Our data shows that innervation is required  
85 to maintain late staged growth, and that changes in the nerve abundance are sufficient to  
86 manipulate (positively or negatively) the ultimate size of the limb regenerate. We have developed  
87 a new regenerative assay that is a derivative of the Accessory Limb Model (ALM), which  
88 decouples the nerve source from the host animal, in an assay that we call the Neural-Modified  
89 ALM (NM-ALM). Using this assay, we were able to determine that non-neural extrinsic factors do  
90 not play an instructive role in size determination during limb regeneration. Last, our findings  
91 indicate that the neural regulation of size requires the nerve cell bodies to remain in their  
92 endogenous environment, suggesting that upstream cues either from the tissue environment  
93 surrounding the nerves or from the Central Nervous System (CNS) are required. Together, our  
94 data indicates that limb nerves play an instructive role on the sizing of the amphibian limb  
95 regenerate. These observations will be foundational to future work on the identification of the  
96 molecular mechanisms that regulate this process.

97

## 98 **Results:**

99 *The axolotl limb undergoes at least three stages of growth during regeneration*

100 The majority of limb regeneration research has focused on the early, developmental  
101 stages of limb regeneration, and there was little data on the later stages when the limb regenerate  
102 grows and matures into a functional structure. Therefore, we started by characterizing the growth  
103 of the regenerate until it had completed regeneration. We measured limb and body length to

104 calculate both limb “proportionality” (ratio of limb length to body length) (Supplemental Figure 1)  
 105 and the growth rate in 10cm sized animals over a period of 140 days, which is when the  
 106 regenerated limb was no longer significantly different in size relative to the uninjured limbs on the

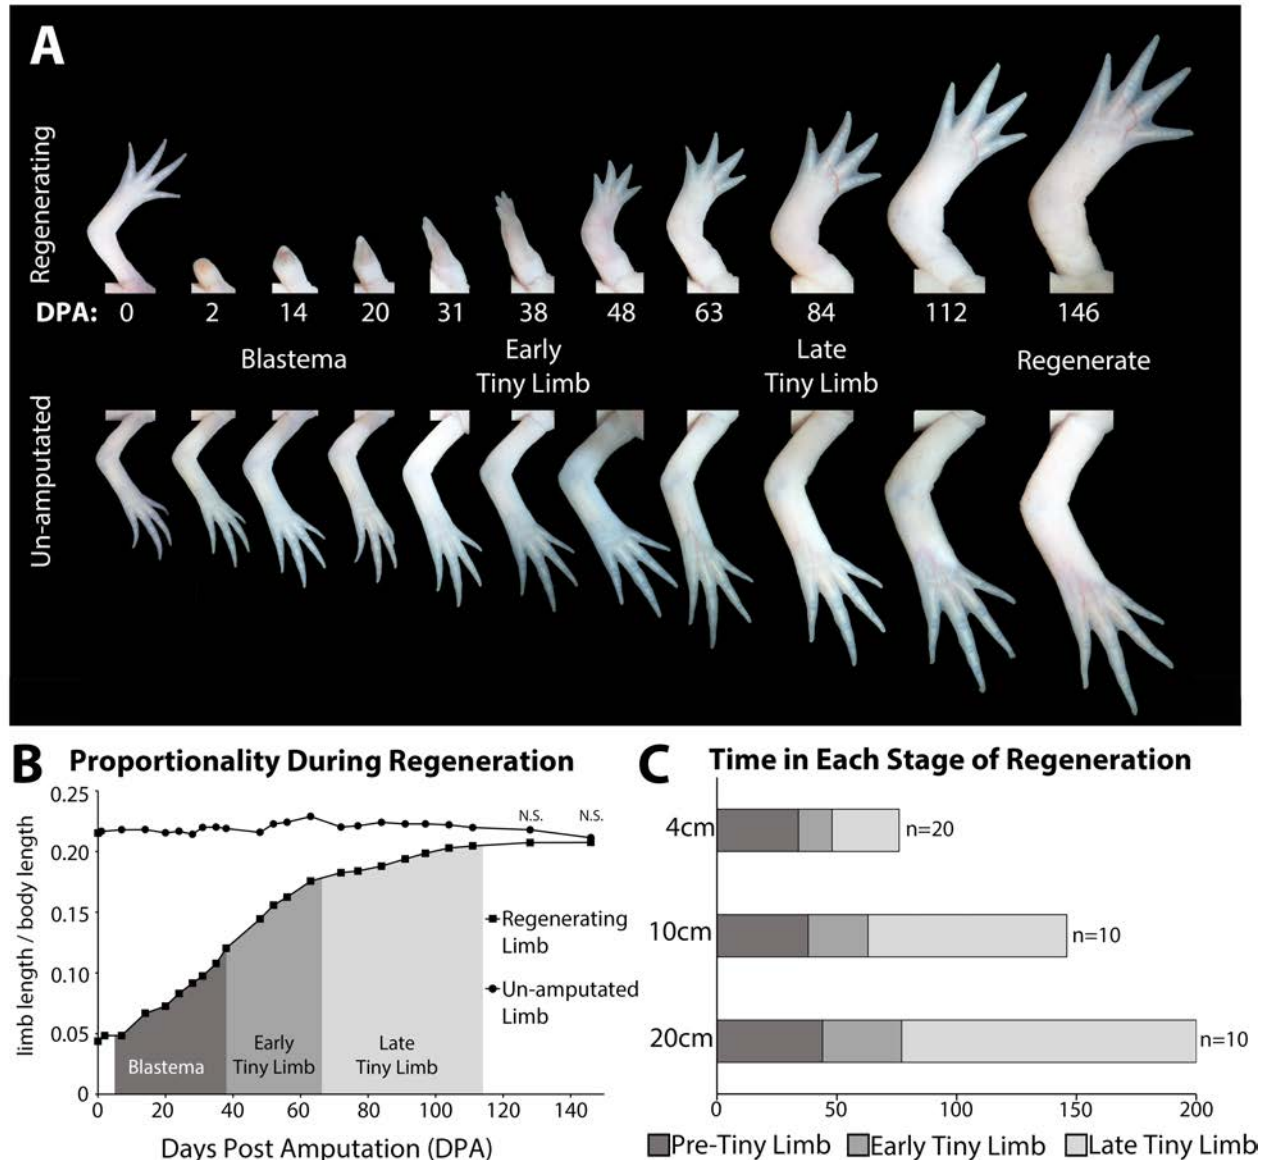

**Figure 1: The tiny limb grows at an increased rate compared to an unamputated limb.** (A) Time course of growth in amputated (top panel) and the contralateral non-amputated (lower panel) limbs on a 10 cm animal over 146 days. (B) The ratio of limb to body length in regenerating and unamputated limbs was measured over time (10cm animals; n=10). We have separated the growth of the limb regenerate into three stages: the blastema stage (dark grey), the early tiny limb stage (medium grey), and the late tiny limb stage (light grey). Error bars = standard error of the mean. T-Test was used to evaluate significance between the regenerating and uninjured limb size at each time point. All data points not marked with N.S. had p-values less than 0.005. (C) Histogram showing the average amount of time in days that the regenerating limb is in each growth stage for animals of different sizes (4 cm, 10 cm, and 20 cm in length).

107 same sized animal, and the growth rate of these limbs was also equivalent. Because axolotls are  
108 indeterminate growers, both their limb and body lengths continue to increase in size during the  
109 course of regeneration, thus the ratio of limb length to body length was used to normalize for the  
110 changes in animal size as time proceeded.

111 We observed that the regenerating limb underwent at least three stages of growth before  
112 it reached the size of the unamputated limb: the blastema stage and two post-developmental  
113 stages (Figure 1A and B). The blastema stage of growth is comprised of the time immediately  
114 following amputation all the way through the digit stage of blastema development. Previous  
115 studies have shown that the expression of growth factors and signaling molecules associated with  
116 blastema development are lost by the digit staged regenerate, thus indicating the end of the  
117 blastema stage, and initiation of post-developmental regenerative processes (Gerber et al., 2018;  
118 Nacu, Gromberg, Oliveira, Drechsel, & Tanaka, 2016; A Satoh, Graham, Bryant, & Gardiner,  
119 2008). The digit staged regenerate is significantly smaller than the unamputated limb on sized-  
120 matched animals (Figure 1A and B). This small regenerate grew rapidly until it reached the  
121 proportionally appropriate size. We have named this post-blastema staged regenerate the “tiny  
122 limb.” The tiny limb grows rapidly at a growth rate that is similar to the speed of growth during the  
123 blastema stage, 0.04 cm/day (Figure 1B and Supplemental Figure 2). Approximately 4 weeks  
124 later (in 10cm sized animals), the growth rate of the tiny limb slows significantly to 0.02 cm/day  
125 over the following 9 weeks until both the size and the growth rate of the regenerated limb is not  
126 significantly different than the unamputated limb on size-matched animals (Figure 1B and  
127 Supplemental Figure 2). Based on this difference in growth rate, we have separated the tiny limb  
128 stage of development into two phases of growth: the early tiny limb stage and the late tiny limb  
129 stage.

130 Both the growth rate and the amount of time spent in each of the three stages (blastema,  
131 early tiny limb, and late tiny limb) is dependent on the size of the animal at the time of limb  
132 amputation. Comparison of these stages between 4, 10, and 20cm animals (snout to tail tip)

133 showed that as body length increases, the growth rate decreases (Supplemental Figure 2) and  
134 the amount of time spent in the tiny limb phase increases (Figure 1C). In fact, when comparing  
135 animals two-fold different in size, the amount of time in the early tiny limb phase increases by 30-  
136 40% (Figure 1C) and growth rate falls by 30-40% (Supplemental Figure 2). This difference in  
137 growth rate (measured in terms of regenerate elongation) may be due to the difference in the  
138 amount of tissue that needs to be regenerated, since larger animals have more tissue to  
139 regenerate than the smaller animals.

140

#### 141 *Growth of the tiny limb is mediated by increased cell number and cell size*

142 We next wanted to determine what cellular mechanisms were contributing to growth of the  
143 tiny limb. Multiple processes can contribute to tissue growth including increased cell number via  
144 regulation of cell proliferation and apoptosis, increased cell size, and extra cellular matrix (ECM)  
145 deposition (Conlon & Raff, 1999; Leervers, Weinkove, MacDougall, Hafen, & Waterfield, 1996;  
146 Penzo-Mendez & Stanger, 2015; Stanger, 2008; Stocker & Hafen, 2000). Thus, we quantified  
147 each of these processes during the different phases of regeneration, relative to uninjured limbs,  
148 to determine which could be contributing to growth of the tiny limb. Additionally, we speculated  
149 that the contribution of these cell processes could vary in the different tissue types in the  
150 regenerating limb. Rather than quantifying the above-described processes globally, we analyzed  
151 the epidermis, soft tissue (including all tissues except for skeleton and epidermis), and skeletal  
152 tissue (bone and cartilage) separately.

153 Regenerating limbs at the different stages of growth were sectioned transversely mid-  
154 zeugopod, and cell proliferation and cell death were each analyzed by either EdU incorporation  
155 or TUNEL staining, respectively. We observed significantly more cell proliferation and significantly  
156 less cell death in all tissues analyzed in the early and late tiny limb staged regenerates compared  
157 to the unamputated and fully regenerated limbs (Figure 2A and B). Interestingly, the fold increase  
158 or decrease in cell proliferation or death, respectively, differed depending on the tissue type. The

159 largest increase in cell proliferation was observed in the epidermis (3.7-fold increase, Figure 2A),  
 160 while soft tissue and skeletal tissue had slightly more modest increases (3.2 and 2.4-fold  
 161 increases respectively, Figure 2A). The largest decrease in apoptosis was seen in the skeletal  
 162 tissue (20.8-fold decrease, Figure 2B), while the soft tissues and epidermis exhibited more  
 163 moderate decreases of 3.0 and 3.3-fold, respectively (Figure 2B).

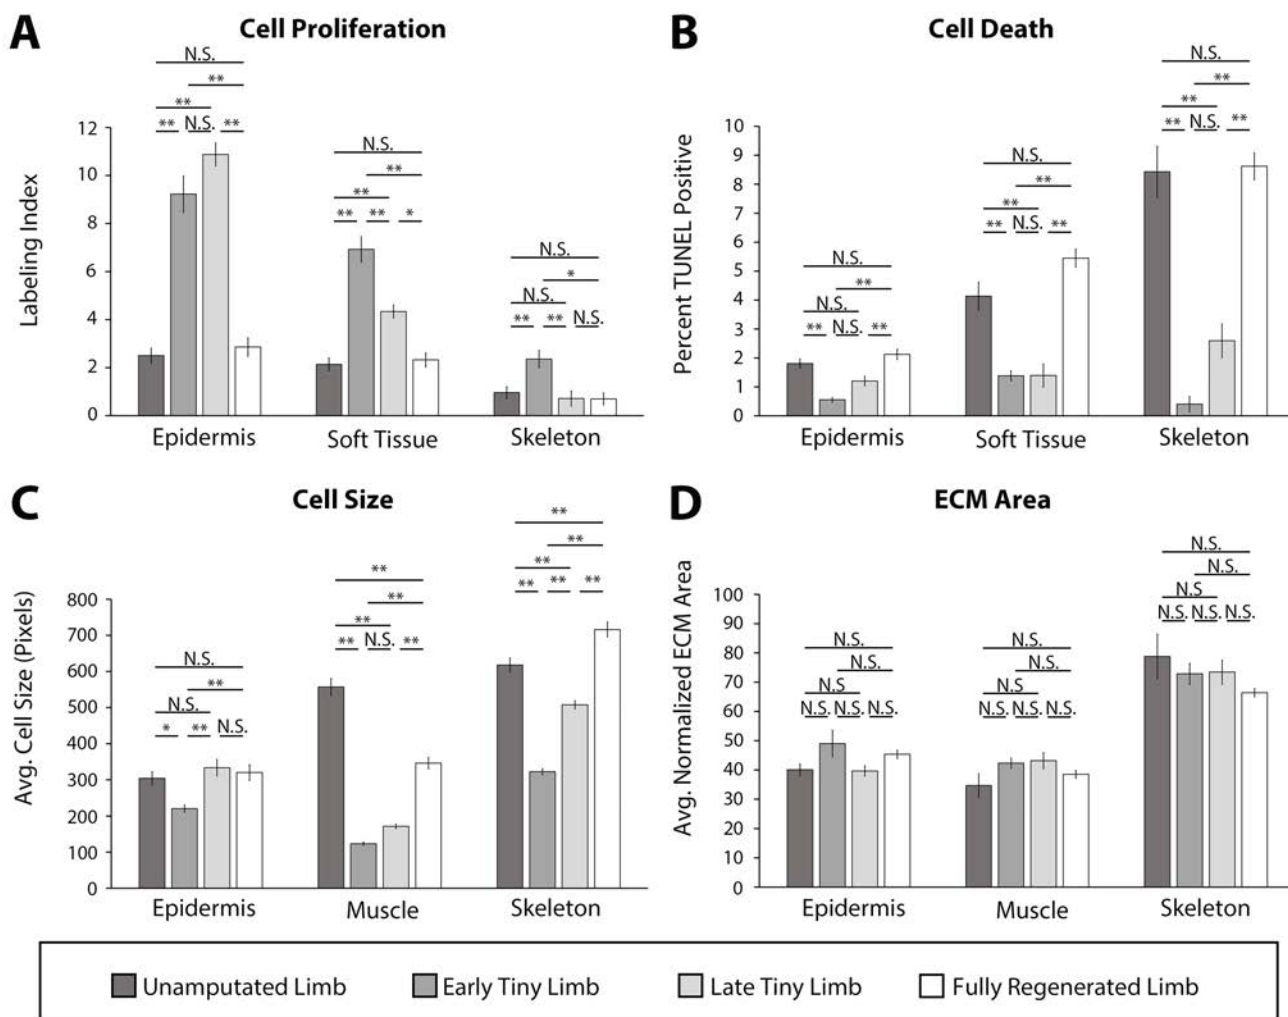

**Figure 2: Tiny limb staged regenerates have increased proliferation, decreased cell death, and smaller cell sizes than uninjured or completely regenerated limbs.** Transverse sections through the zeugopod of limbs at different stages of regeneration were analyzed for cell proliferation (A), apoptosis (B), cell size (C), and ECM size (D). (A and B) Cell proliferation and death were analyzed in the epidermis, soft tissue, and skeletal elements. A) Cell proliferation was analyzed by EdU labeling (n=5). B) Cell death was analyzed using TUNEL labeling (n=4). (C and D) Cell and ECM size measurements were quantified in the epidermis, muscle, and skeletal elements. C) Cell size was quantified using fluorescently tagged Wheat Germ Agglutinin (plasma membrane) for epidermal and muscular analysis and Alcian Blue staining (collagen) for skeletal analysis (n=4). D) ECM area was calculated by [(tissue area – cellular area)/tissue area] (n=4). Error bars = SEM. P-values calculated by ANOVA and the Tukey Post-hoc test. \*p<0.05 \*\*p<0.005.



164 Cell size and ECM area were analyzed using a combination of fluorescent and histological  
165 stains on sectioned limbs. Wheat Germ Agglutinin was used to label the plasma membrane of the  
166 epidermal and muscle cells, and Alcian blue stained the ECM of the skeletal tissue (Supplemental  
167 Figure 2) (more detail in materials and methods). To standardize our quantification of the average  
168 cell size, we measured only the area of cells where the nucleus was observable (Supplemental  
169 Figure 2A). We observed that cell size was significantly smaller in the regenerating tissue than  
170 the uninjured tissue and increased as regeneration progressed (Figure 2C). This was most  
171 profound in the muscle (4.5-fold smaller) and least in the epidermis (1.4-fold smaller, Figure 2C).  
172 The ECM area was calculated indirectly by subtracting the total cellular area from the tissue area  
173 and dividing by the tissue area (Supplemental Figure 2B) (more detail in materials and methods).  
174 However, we did not observe any significant differences in the extracellular compartment of limbs,  
175 indicating that ECM deposition does not play a significant role in growth of the tiny limb (Figure  
176 2D).

177 Together, this data indicates that a combination of increased cell proliferation, decreased  
178 apoptosis, and increased cell size contributes to the growth of the tiny limb staged regenerate.  
179 Additionally, while all tissue types showed the same trends in all of the cell processes that we  
180 analyzed, our data suggests that different cell processes contribute more or less to growth in  
181 different tissue types. Future studies will be required to resolve these tissue-specific contributions  
182 to growth in more detail.

183

#### 184 *Growth of the Tiny Limb is dependent on limb nerves*

185 One interesting observation from the above-described characterization is that the  
186 abundance of cell proliferation, cell death, and cell size all show similar trends regardless of the  
187 tissue type assessed during each stage of growth in the regenerate. This suggests that there  
188 could be a singular signal that coordinates these processes such that the highest growth-  
189 promoting signal is occurring during the early tiny limb stage when growth is most abundant and

190 decreases as the growth rate slows during the late tiny limb stage. Thus, we next sought to  
191 determine the source of the signal that regulates cell proliferation, death, and size during  
192 regeneration.

193 Previous studies indicate that nerve signaling is required for growth in developing and  
194 regenerating limbs. The role and mechanism of neurotropic regulation during the early (blastema)  
195 stages of regeneration has been widely studied (Farkas, Freitas, Bryant, Whited, & Monaghan,  
196 2016; Farkas & Monaghan, 2017; Kumar, Nevill, Brockes, & Forge, 2010; Makanae, Mitogawa, &  
197 Satoh, 2014; Singer, 1946, 1952, 1978; Singer & Inoue, 1964). It has been well established that  
198 nerve signaling is required for, and is a key driver of, blastemal cell proliferation (Brockes, 1984;  
199 Brockes & Kintner, 1986; Lehrberg & Gardiner, 2015). Furthermore, generation of permanently  
200 miniaturized limbs through repeated removal of limb buds results in “mini limbs” that are hypo-  
201 innervated compared to controls (D. M. Bryant et al., 2017). We therefore hypothesized that  
202 nerves could play a role in driving growth during the tiny limb stages of regeneration.

203 To test this idea, we first characterized the abundance of innervation during these post-  
204 developmental stages of regeneration. We collected early and late tiny limbs, as well as  
205 unamputated and fully regenerated limbs for comparison, and sectioned them transversally  
206 through the zeugopod. The sections were stained with an anti-acetylated tubulin antibody (nerve

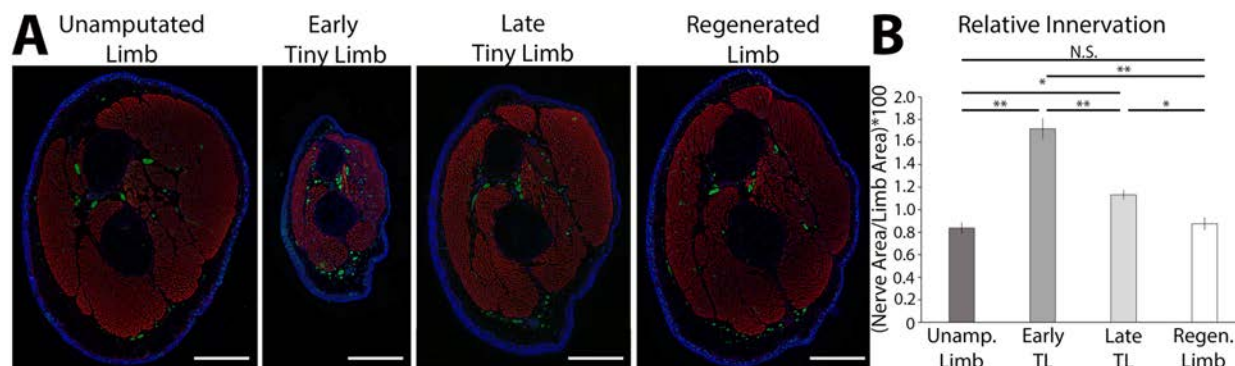

**Figure 3: The tiny limb staged regenerate is hyperinnervated.** A) Fluorescent images were obtained of transverse sections of uninjured, early and late tiny limb stages, and fully regenerated limbs (DAPI = blue, Phalloidin (for actin filaments) = red, Acetylated-tubulin (for nerves) = green; scale bars are 1000um). B) Nerve area relative to total limb area was quantified from the sections represented in A (n=5). Error bars = SEM. P-values calculated by ANOVA and the Tukey Post-hoc test. \*=p<0.05 \*\*=p<0.005.

207 – green, Figure 3A), and we measured the abundance of innervation relative to the limb area  
208 (Figure 3B). This quantification revealed significantly higher levels of relative innervation during  
209 the early and late tiny limb stages compared to unamputated and fully regenerated limbs (Figure  
210 3B). Interestingly, the total abundance (not normalized to tissue area) of innervation increases  
211 from the early to late tiny limb stages (Supplemental Figure 4). Thus, the decrease in relative  
212 innervation during the transition from the early to late tiny limb stages is likely due to the  
213 substantial increase in limb area of the later staged regenerate. The relative abundance of  
214 innervation also correlates well with the growth rate in these tissues. The early tiny limb stage has  
215 the highest relative abundance of innervation, followed by the late tiny limb stage (Figure 3B).  
216 The abundance of innervation of the completed regenerate has decreased to that of the uninjured  
217 limb (Figure 3B). We speculated that nerves could provide growth-promoting signals during  
218 regeneration, which decreases as the relative abundance of innervation decreases, slowing the  
219 growth of the regenerate as it reaches its final size.

220 To determine whether nerve signaling plays a functional role in determining size, we next  
221 tested whether nerve signaling is required to maintain growth in the tiny limb staged regenerate.  
222 Limbs were amputated and permitted to regenerate to the early tiny limb stage, at which point  
223 nerve signaling was severed (blue line, Figure 4A) via denervation at the brachial plexus. To test  
224 for a possible dose response or signaling threshold effect, we severed either one, two, or all three  
225 of the nerve bundles at the plexus. Mock denervation surgeries were performed as controls. The  
226 limbs were measured prior to denervation and four days post denervation, when they were  
227 collected for analysis. The growth rate, abundance of cell proliferation, abundance of cell death,  
228 and cell size were all analyzed (Figure 4B-E).

229 We observed that nerve signaling is required for growth of the tiny limb. Fully denervated  
230 early tiny limbs had a 9-fold slower growth rate than innervated early tiny limbs (Figure 4B).  
231 Likewise, cell proliferation was negatively impacted by denervation in all tissue types analyzed  
232 (1.7, 4.9, and 4.8-fold decreases in the epidermis, soft tissue, and skeleton respectively; Figure

233 4C). Cell death levels in all tissues were significantly increased following full denervation (21.6,  
 234 1.6, and 25.7-fold increases in epidermis, soft tissue, and skeleton respectively; Figure 4D).  
 235 Lastly, cell size appears to only be significantly affected in the muscle, where there is a near 2-  
 236 fold decrease in average cell size in the denervated early tiny limbs (Figure 4E). When late tiny  
 237 limbs were fully denervated, only the growth rate and abundance of cell proliferation were  
 238 significantly decreased (Supplemental Figure 5). Thus, neurotrophic regulation of cell death and  
 239 cell size (in the muscle tissue) appears to be restricted to the early tiny limb stage of growth.

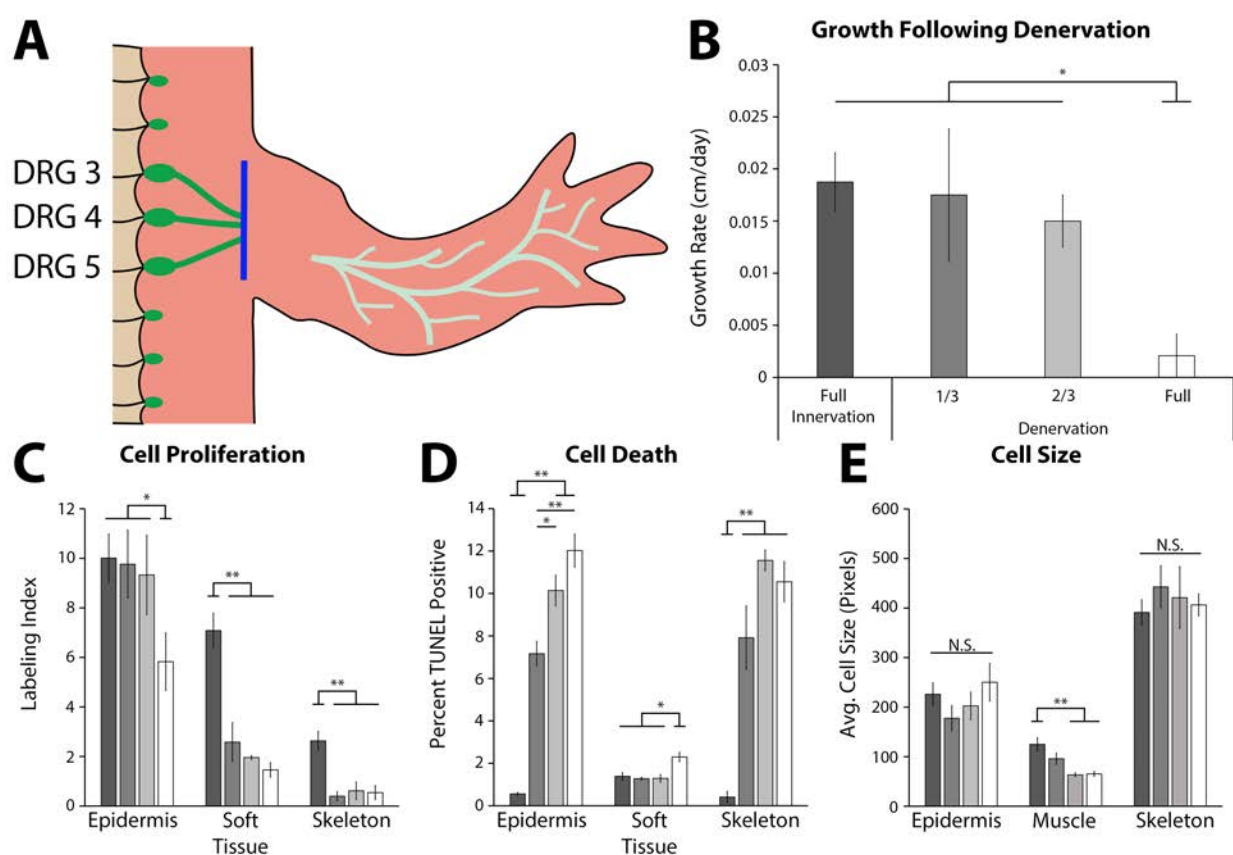

**Figure 4: Innervation is required for growth of the tiny limb staged regenerate.** A) Dorsal root ganglia (DRGs) 3, 4, and 5 (green dots) are located lateral to the spinal column and their nerve bundles (green lines) feed into the forelimbs. Limbs were amputated and permitted to regenerate to the early tiny limb stage, at which point, either a mock, partial (1/3 = DRG 5 or 2/3 = DRGs 4 and 5), or full denervation (represented) was performed by severing (blue line) and removing sections of the nerve bundles. Limbs were collected 4 days post denervation, and growth rate (B), cell proliferation (C), cell death (D), and cell size (E) were analyzed for limbs with mock denervations (n=6), 1/3 denervations (n=5), 2/3 denervations (n=5), and full denervations (n=6). The color of the bars in panels C-E refers to the color of the bars in panel B. Error bars = SEM. P-values calculated by ANOVA and the Tukey Post-hoc test. \* $p < 0.05$  \*\* $p < 0.005$ .

240 The partial denervations revealed either a dose response or threshold response depending  
241 on the tissue and growth characteristic quantified. A dose response is reflected by a linear  
242 relationship between abundance of signal and the phenotype. A threshold response indicates a  
243 specific abundance of a signal is required for a phenotype, for example, a specific level of  
244 innervation is required for growth. We observed that cell proliferation in the soft tissue and  
245 skeleton decreased significantly, to full denervation levels, with partial denervations indicating that  
246 there is a high threshold of nerve signaling responsible for maintaining cell proliferation in these  
247 tissues (Figure 4C). Conversely, cell death in the epidermis had a strong dose response, with  
248 significant incremental increases with increased denervation (Figure 4D). These results indicate  
249 that each tissue responds differently to nerve signaling to maintain growth. This could explain the  
250 decreasing growth rate trend in partial denervations, which only becomes significant with the full  
251 denervation (Figure 4B). Together these results reveal the complexity of neuronal regulation of  
252 growth and indicate that an evaluation of the tissue-specific responses to nerve signaling is  
253 required for a complete understanding of growth and size regulation during regeneration.

254

#### 255 *Innervation abundance determines regenerate length*

256 Having established that nerve signaling is required to maintain growth during limb  
257 regeneration, we next wanted to determine whether we could positively and negatively manipulate  
258 the size of the regenerate by altering the abundance of innervation. To test this, we performed a  
259 grafting experiment between differently sized axolotl (Figure 5A). Limb nerve bundles increase in  
260 size as the animal grows, and quantification of the cross-sectional area of the nerve bundles  
261 extending out from the limb Dorsal Root Ganglia (DRGs) reveals that the size of the bundle is  
262 almost 2-fold larger in 14cm long animals compared to 7cm animals (Supplemental Figure 6).  
263 Thus, blastema grafts onto the limbs of large hosts will be innervated by larger nerve bundles  
264 than grafts on small host animals.

265 To generate large and small animals we housed age-matched GFP+ (donors) and GFP-

266 (hosts) axolotl at either 19°C or 4°C. Housing half the animals at 4°C stunted their growth while  
 267 the 19°C animals grew at a faster rate. After approximately two months, the 19°C animals were  
 268 2-fold larger in body length and limb length than the 4°C animals (Figure 5B). After the large and  
 269 small siblings were both incubated at 19°C for 14 days, both forelimbs on small (~6cm) and large  
 270 (~12cm) GFP+ axolotl were amputated and permitted to regenerate to the mid-bud blastema  
 271 stage (Figure 5A and B). The blastemas and approximately 2mm of stump tissue were grafted  
 272 onto regenerative permissive environments on small (~6cm) and large (~12cm) GFP- host

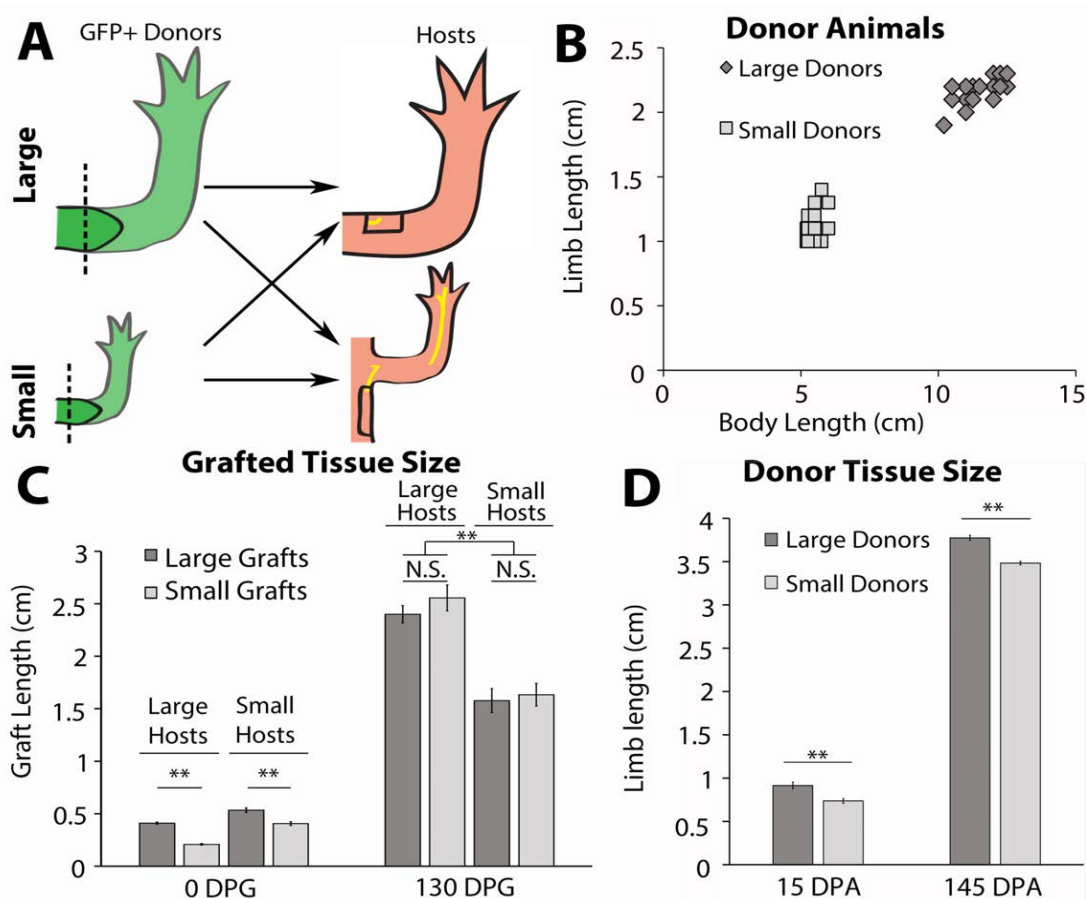

**Figure 5: Innervation abundance determined regenerate size.** A) Blastemas with approximately 2mm of stump tissue from large and small GFP+ donor animals were grafted onto a regenerative permissive environment, a wound site with a deviated limb nerve bundle, on large or small host animals. B) Limb length and body length were measured on the GFP+ donor animals. C) The regenerating grafted tissues were measured at 0 and 130 DPG. Blastemas from large donors (dark grey) were grafted onto large (n=7) and small (n=9) host animals, and blastemas from small donors (light grey) were grafted onto large (n=9) and small (n=10) host animals. D) The regenerating large (n=10) and small (n=20) animal donor limbs were measured at 15 and 145 days post amputation. Error bars=SEM. P-values calculated by ANOVA and the Tukey Post-hoc test. \*=p<0.05 \*\*=p<0.005.

273 animals (Figure 5A). It has previously been found that cells from approximately 500 $\mu$ m of stump  
274 tissue migrate and contribute to the regenerate (Currie et al., 2016). Therefore, stump tissue was  
275 included with the blastemas to prevent the contribution of cells from the host environment to the  
276 regenerate.

277 A regeneration permissive environment on the large animal hosts was generated by  
278 deviating the branchial nerve bundle to an anterior located wound site on the limb, using the  
279 standard Accessory Limb Model surgery (Figure 5A) (Endo, Bryant, & Gardiner, 2004; McCusker  
280 & Gardiner, 2013). Because the limb circumference of the small host animals was too small to  
281 receive the grafted blastema tissue from the large donors, we deviated the branchial nerve to a  
282 wound site on the flank of the host, where a larger skin wound could be made to fit the larger graft  
283 size (Figure 5A). The length of the ectopic limbs was measured bi- or tri-weekly. They were  
284 considered fully regenerated when the ectopic limb growth rate was no longer significantly  
285 different from the limbs of the host animals. The donor animal limbs that were amputated for the  
286 blastema grafts were also continually measured during regeneration as an additional control to  
287 determine limb sizes of the large and small blastemas if left on their native environment.

288 We hypothesized that if nerve abundance can regulate size of the limb regenerate, we  
289 would observe that the lengths of the grafted regenerates will correspond to the size of the host  
290 environment rather than the donor. Thus, blastemas from the small donors will produce large  
291 ectopic limbs when grafted to large hosts, and blastemas from large donors will produce small  
292 ectopic limbs when grafted to small hosts. Alternately, if nerve abundance does not influence  
293 regenerate size, then we would expect to see the blastemas from small donors on large hosts  
294 produce ectopic limbs smaller than the control grafts from large animals, and vice versa.

295 We observed that nerve abundance influenced ectopic limb size. The blastemas (15 days  
296 post amputation) from small donors were initially 2-fold smaller than those from large donors when  
297 they were grafted onto the host environments (Figure 5C, left panels, 0 days post graft (DPG)).  
298 Interestingly, we observed that the grafted tissues were the same size by 18 DPG within each

299 host type (Supplemental Figure 7A). By approximately 38 DPG, there was a significant difference  
300 in size between the ectopic limbs on the large and small host animals, and this continued until  
301 130 DPG, when the growth rate of the grafted limbs matched that of the host limbs (Figure 5C,  
302 right panels; Supplemental Figure 7A). In comparison, the control regenerates on the donor  
303 animals remained significantly different in size throughout regeneration (Figure 5D). These data  
304 indicate that the sizing of the limb regenerate positively correlates with nerve abundance.  
305 However, it does not rule out other potential influences from the host environments that may also  
306 contribute to size. Thus, we next designed an experiment that decouples nerve abundance from  
307 the size of the host to test whether non-neural signals contribute to the sizing of the limb  
308 regenerate.

309

310 *Non-neural extrinsic signals do not provide instructive cues on regenerate size.*

311 To evaluate the potential role of non-neural sources of size regulation that may be present  
312 in the differently sized host animals we developed a new regenerative assay called the Neural

313 Modified

314 Accessory Limb

315 Model (NM-

316 ALM) that

317 decouples the

318 source of the

319 nerves from the

320 host

321 environment

322 (Figure 6B). In

323 the NM-ALM, the

324 limb Dorsal Root

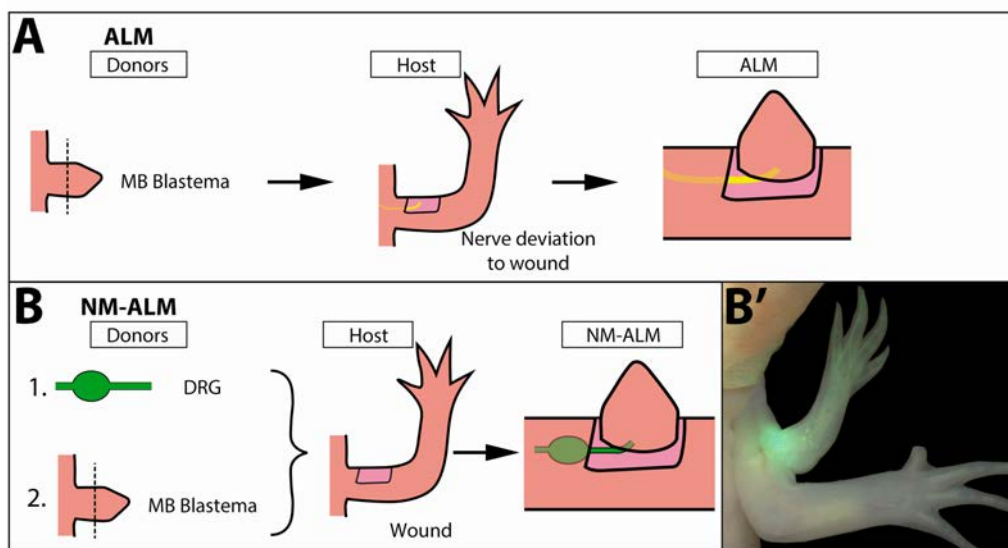

**Figure 6: Decoupling host environment with innervation using the Neural-Modified ALM (NM-ALM).** A) The traditional ALM (as used in Figure 5) requires a blastema donor and a host animal with a nerve bundle deviated to the wound site. B) The NM-ALM requires a GFP+ DRG donor, blastema donor, and host limb with a wound site. B') The DRG's GFP+ axons regenerate and innervate the ectopic limb.



325 Ganglia (DRGs) from GFP+ donor animals are harvested and grafted into lateral limb wounds on  
326 host animals (one DRG per wound). The GFP+ DRGs are grafted below the mature skin next to  
327 the wound site, and the axon bundles are pulled into the middle of the wound site in a similar  
328 manner as the traditional ALM surgery. Mid-bud blastema staged regenerates from age-matched  
329 donors are then grafted onto the wound site (Figure 6B). We measured the length of the ectopic  
330 limbs in the NM-ALM weekly or bi-weekly, and their growth rates (cm/day) were compared to the  
331 unamputated limbs on the donors. The grafted limbs were considered to have completed limb  
332 regeneration when their growth rates were not significantly different from the growth rates of the  
333 unamputated limbs on the control animals. We observed that the implanted DRG supported the  
334 continued development of the blastema into a completely patterned and differentiated limb (Figure  
335 6B'). Thus, the implanted DRGs are able to provide the appropriate signals to support the  
336 regenerative process.

337 To test whether non-neural extrinsic signals provide instructive cues that regulate the size  
338 of the regenerating limb we performed the NM-ALM on differently sized host animals (Figure 7A).  
339 If non-neural extrinsic signals play a role in regulating the size of the regenerate, then we expected  
340 to observe that the regenerates that grew in the NM-ALMs on the large (14 cm) hosts would be  
341 larger in size than the ones that grew on the small (7 cm) hosts (Figure 7B). Alternately, if  
342 signaling from the nerves play the major instructive role then we would not expect to see  
343 differences in the size of the regenerates on the different sized hosts. After 135 days post grafting,  
344 we observed that there continued to be no significant difference in the length of the grafted  
345 regenerates on the different sized host animals (Figure 7C). This trend was observed in NM-ALMs  
346 that were performed with DRGs that were harvested from both large and small animals  
347 (Supplemental Figure 7B). In contrast, the control uninjured limbs on the small and large animals  
348 remained significantly different in size (Figure 7D). Because the size of the limb regenerate was  
349 not impacted by the host environment when the abundance of innervation was constant, we  
350 conclude that non-neural extrinsic factors play a negligible role on instructing the size of the

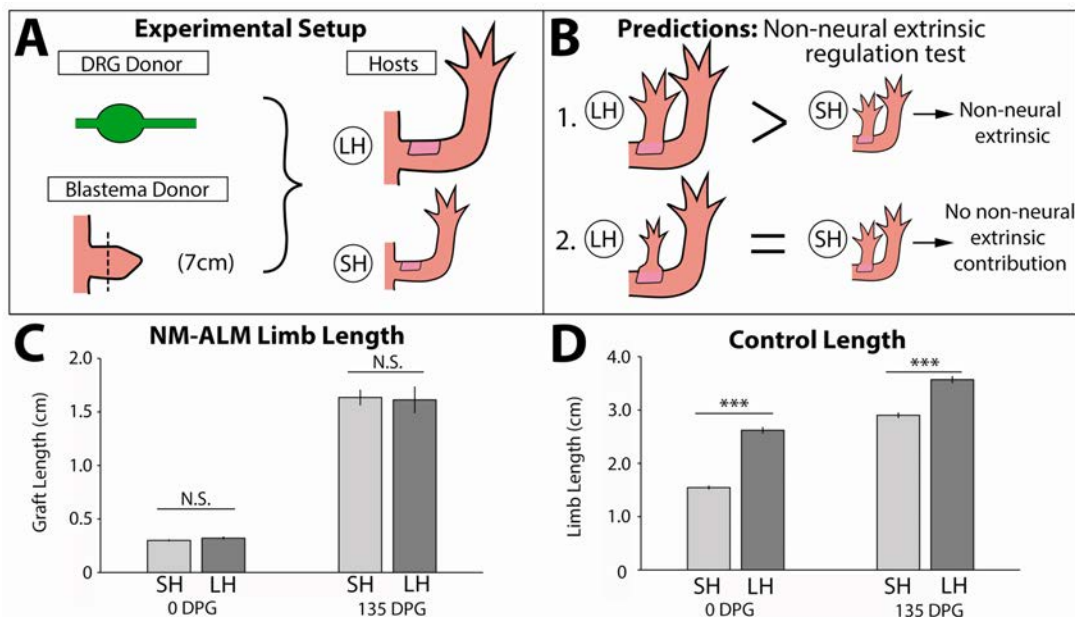

**Figure 7: Non-neural extrinsic factors do not play an instructive role in size regulation.** A) DRGs from GFP+ donor animals (~14cm) were grafted into wound sites on large (~14cm, n=12) and small (~7cm, n=19) host animals followed by mid-bud blastemas from (~7cm) donor animals. B) If non-neural extrinsic factors play an instructive role in size regulation, then the large host animals would produce a larger ectopic limb than those on the small host animal. If non-neural factors do not play an instructive role then the ectopic limbs will be the same size, regardless of host size. C) The ectopic limb lengths were the same size at 0 DPG and remained the same throughout regeneration (135 DPG). D) The unamputated limbs on the control animals remained different sizes throughout the course of the experiment (n=10). Error bars=SEM. P-values calculated by T-tests. \*\*\*=p<0.0005.

351 regenerate. We, however, are not ruling out the possible (and likely) supportive role that other  
 352 extrinsic factors may play in the growth of the regenerate.

353

354 *Size regulation cues from limb nerves are not autonomous*

355 To test whether the neural regulation of regenerate size is autonomous or not, we  
 356 leveraged our newly developed NM-ALM assay using DRGs that were harvested from different  
 357 sized GFP+ donors (14cm versus 7cm) (Figure 8A). Our expectation was that if neural regulation  
 358 of size occurs autonomously (at the DRG-level), then the size of the regenerated limb that grew  
 359 on the DRG from the large donor would be larger than that which grew on the one from the small  
 360 donor (Figure 8B). Conversely, if the DRGs require a connection with their native environment to

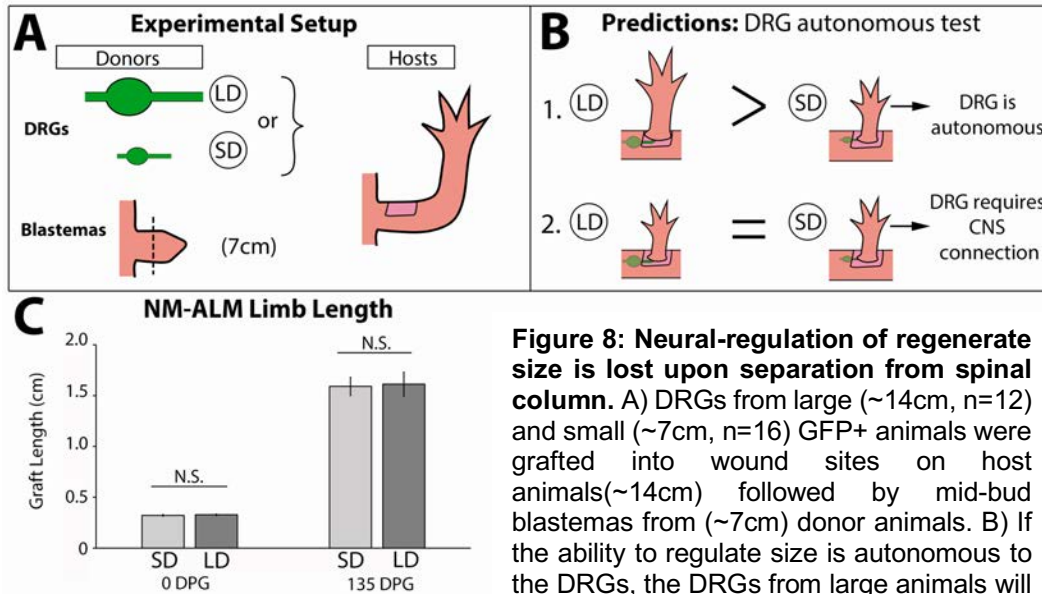

**Figure 8: Neural-regulation of regenerate size is lost upon separation from spinal column.** A) DRGs from large (~14cm, n=12) and small (~7cm, n=16) GFP+ animals were grafted into wound sites on host animals (~14cm) followed by mid-bud blastemas from (~7cm) donor animals. B) If the ability to regulate size is autonomous to the DRGs, the DRGs from large animals will produce larger ectopic limbs than those from small animals. If size regulation is not autonomous, there will be no difference in ectopic limb size between grafts supplied by large or small animal DRGs. C) The ectopic limb lengths were the same size at ODPG and remained the same throughout regeneration (135DPG). Error bars=SEM. P-values calculated by T-tests.

produce larger ectopic limbs than those from small animals. If size regulation is not autonomous, there will be no difference in ectopic limb size between grafts supplied by large or small animal DRGs. C) The ectopic limb lengths were the same size at ODPG and remained the same throughout regeneration (135DPG). Error bars=SEM. P-values calculated by T-tests.

361 regulate regenerate size, then we expected to see no difference in the regenerate size regardless  
362 of the donor source of the DRG (large or small) (Figure 8B). Because we had previously observed  
363 a dose response in limb growth in partially denervated regenerating limbs (Figure 4), we  
364 hypothesized that limb size could be regulated by nerve abundance alone. However, our data  
365 showed that there was no statistical difference in ectopic limb length between the regenerates  
366 generated from NM-ALMs implanted with the DRGs from small or large animals (Figure 8C). This  
367 trend was observed on the NM-ALMs on both the large and small hosts (Supplemental Figure  
368 7B). Thus, we concluded that factors from the DRGs' endogenous environment are required for  
369 the neural regulation of regenerate size. Future studies will focus on the cells and signals that  
370 play a role in this upstream regulation.

371

## 372 Discussion:

373 One of the last steps of regeneration required to generate a fully functional limb is the  
374 growth of the regenerate to a size that is proportionally appropriate to the animal. However, little

375 data had previously been collected on the post-blastema stages of regeneration and how growth  
376 and size are regulated. This study constitutes the first thorough investigation of how the  
377 regenerating limb grows to the proportionally appropriate size. We have discovered that there are  
378 three distinct phases of growth prior to the limb completing regeneration; the blastema phase, the  
379 early tiny limb phase, and the late tiny limb phase (Figure 1). During the tiny limb phases of growth,  
380 the regenerate grows through increased cell proliferation, survival and cell size (Figure 2), and  
381 innervation is required to maintain this growth (Figure 3 and 4). Our data indicates that nerves  
382 play the instructive role in size regulation (Figure 5 and 7), and that factors from the native neural  
383 environment are required for this regulation of regenerate size.

384

#### 385 *Size determination during limb development versus limb regeneration*

386 Previous studies on developing amphibian limbs suggest that both intrinsic and extrinsic  
387 factors determine size during embryogenesis. One example is from the classic cross-grafting  
388 study performed by Ross Harrison using limb buds between two differently sized salamander  
389 species (Harrison, 1924). In this experiment, limb buds from *Ambystoma tigrinum* (adult body  
390 length of 27cm) were grafted to *Ambystoma punctatum* (adult body length of 16 cm) hosts and  
391 vice versa (Harrison, 1924). It was observed that the grafted limb buds grew to sizes that failed  
392 to correspond with limbs from either the donor or the host. Rather, the limb buds from *Ambystoma*  
393 *punctatum* grew to a size that was smaller than the both the host and donor limbs when grafted  
394 to *Ambystoma tigrinum*, while the *Ambystoma tigrinum* limb buds grew larger than the host and  
395 donor limbs when grafted to *Ambystoma punctatum*. These observations indicate that limb size  
396 is determined through both the intrinsic growth capacity of the cells and an extrinsic growth  
397 promoting factor that is present in different abundances in the embryos of different host species  
398 (Harrison, 1924). It was later shown that when the host animals were fed to capacity, the growth  
399 rates of the grafted limbs mimicked the donor animal's growth rate, but final size of the limb was  
400 more closely matched to the host (Twitty & Schwind, 1931). Thus, these classic studies

401 demonstrate that limb size can be influenced by environment, such as available nutrients, during  
402 embryonic development.

403 While our study clearly shows that extrinsic signals from the adult limb nerves play a  
404 central role in determining size of the regenerate, it is unknown whether the same nerve-  
405 dependent mechanisms are at play during limb bud development in the axolotl. During embryonic  
406 limb development, the Apical Ectodermal Ridge (AER) signaling center produces factors such as  
407 FGFs and BMPs, which maintain an undifferentiated state and drive proliferation in the limb bud  
408 mesenchyme. The AER is established in an aneurogenic environment in *Xenopus laevis*, *Rana*  
409 *pipiens*, *Ambystoma punctatum*, and *Ambystoma maculatum* (Keenan & Beck, 2016; Kumar et  
410 al., 2011; Nieuwkoop & Faber, 1958; Taylor, 1943; Yntema, 1959), while regenerating limbs  
411 require signaling from the nerve to establish the analogous structure, the Apical Epithelial Cap  
412 (AEC) (Singer, 1978; Singer & Inoue, 1964). However, axolotl develop limb buds as larvae, not  
413 as embryos, and it is unknown whether the axolotl limb bud is innervated or not. Thus, it is possible  
414 that the regulation of limb size in the axolotl limb bud and blastema are both dependent on nerve  
415 signaling. Regardless, it remains unknown whether the same molecular signals are regulating  
416 size in both embryonic and regenerating limbs. As more information on the molecular  
417 mechanisms of this process are pieced together, comparative studies can determine conservation  
418 between development and regeneration in different amphibian species.

419 It should be noted that our study does not rule out the influence of intrinsic factors that  
420 regulate the size of the regenerating limb. Because our study was performed on sibling  
421 *Ambystoma mexicanum*, there were minimal genetic differences between donor and host  
422 animals. Performing a similar cross grafting experiment, as was performed by Ross Harrison  
423 (1924), between species of different sizes in the context of regeneration would yield valuable  
424 insight in this regard.

425

426 *Potential role of other extrinsic factors in determining size of the limb regenerate*

427 Our studies indicate that, as opposed to the limb nerves, other extrinsic factors do not play  
428 an instructive role in size regulation (Figure 7). However, we have not ruled out the potential  
429 contributions of non-neuronal extrinsic factors in supporting the growth of the regenerate. These  
430 could include bioelectric signals (Blackiston, McLaughlin, & Levin, 2009; Levin, 2012), hormones  
431 (Penzo-Mendez & Stanger, 2015), and circulating growth factors (P. J. Bryant & Simpson, 1984;  
432 Conlon & Raff, 1999). For example, bioelectric signals are key regulators of size and  
433 proportionality in zebrafish fins, where mutations that generate a leaky potassium channel results  
434 in an overgrowth phenotypes (Perathoner et al., 2014). Furthermore, regeneration in a short fin  
435 phenotype zebrafish line results in longer fins when treated with a Calcineurin inhibitor, affecting  
436 function of the same potassium channel (Daane et al., 2018). In these studies, the bioelectric  
437 signals are altered autonomously in the tissue; however, bioelectricity has the potential to be  
438 regulated systemically through electromagnetic fields and paracrine signaling (Levin, 2012).

439 It is also possible that systemic growth factors or hormones could support growth during  
440 regeneration. For example, humans and other mammals can undergo a process known as catch-  
441 up growth, which occurs in pre-adult humans that exhibit stunted growth as a result of exposure  
442 to a stressor such as sickness, emotional stress, or malnourishment (Boersma & Wit, 1997;  
443 Williams, 1981). Upon the removal of the source of stress the animal undergoes rapid whole-  
444 body growth to “catch-up” to the size that they would have been at their stage of development.  
445 Catch-up growth is dependent on the increased expression of growth promoting hormones, such  
446 as growth hormone (GH) and insulin growth factor (IGF) in the recovering animals, which could  
447 be regulated by the nervous system (Boersma & Wit, 1997; Penzo-Mendez & Stanger, 2015).  
448 Although there are similarities, there are multiple facets that distinguish the process of limb  
449 regeneration from catch-up growth. First, catch-up growth occurs to the entire body, while the  
450 growth of the limb regenerate is isolated to the regenerating structure. Additionally, the success  
451 of catch-up growth is largely dependent on the duration of the source of stress and the life-stage  
452 of the human when the source is removed. In contrast, axolotl are capable of regenerating

453 complete limbs to the appropriate size irrespective of life stage (Figure 1 and Supplemental Figure  
454 2). Regardless, the potential role of neuroendocrine regulation on growth has not yet been tested  
455 in regenerating axolotl limbs.

456       Systemic factors also play a role in compensatory growth mechanisms. Compensatory  
457 growth typically refers to re-growth of missing tissue or a particular organ rather than the entire  
458 organism (Boersma & Wit, 1997; Holder, 1981). For example, following a partial hepatectomy in  
459 mammals, the remaining liver tissue will regenerate to reestablish proper liver volume  
460 (Michalopoulos, 2007). The drivers of compensatory growth are often both local and systemic  
461 cues that stimulate regrowth through a feedback mechanism until the appropriate size is reached  
462 (Boersma & Wit, 1997; Holder, 1981; Williams, 1981). However, there are key differences  
463 between limb regeneration and compensatory growth. Compensatory growth involves  
464 reactivation of the cell cycle in differentiated cells. Regeneration involves dedifferentiation of  
465 mature cells into blastema cells, proliferation, and redifferentiation into the missing tissue  
466 (McCusker, Bryant, & Gardiner, 2015). Furthermore, compensatory growth is thought to cease  
467 once the original size is restored, whereas limb regeneration proceeds until proper proportionality  
468 is reestablished rather than when original size is reached. Therefore, while regeneration is not  
469 considered compensatory growth it is possible that similar feedback between the regenerating  
470 limbs and circulating factors in the host body play a role in regulating limb size.

471

#### 472 *Mechanism of neurotrophic regulation of size during limb regeneration*

473       Observations from multiple species indicate that neural regulation of limb size is a  
474 conserved mechanism. Most notably in humans, damage to the limb nerves correlates to  
475 decreased limb size, while overabundance of innervation corresponds to limb or digit enlargement  
476 (Tsuge & Ikuta, 1973; Bain et al., 2012; Cerrato et al., 2013; Labow, Pike, & Upton, 2016).  
477 However, one of the main unanswered questions remaining is how nerves are regulating size  
478 specifically during limb regeneration. While the molecular mechanism by which nerves regulate

479 size has not been determined, the role of innervation during the early stages of limb regeneration  
480 has been extensively studied and might be drawn upon to provide insight into their role in size  
481 regulation. During the early stages of limb regeneration, it has been observed that innervation of  
482 the wound epithelium is essential to establish the apical epithelial cap (AEC). The AEC then  
483 produces growth factors essential to induce and maintain the cells in a dedifferentiated state and  
484 drive blastema cell proliferation (McCusker et al., 2015). Indeed, Satoh *et al.* demonstrated that  
485 FGF8 and BMP7 are directly produced by the nerves in the Dorsal Root Ganglia (DRGs) and  
486 migrate to the wound epithelium (Satoh, Makanae, Nishimoto, & Mitogawa, 2016). Furthermore,  
487 the requirement of nerves for limb regeneration can be supplemented for by cocktails of growth  
488 factor proteins including Fibroblast Growth Factors (FGFs) and Bone Morphogenic Proteins  
489 (BMPs) (Makanae et al., 2014; Akira Satoh et al., 2016; Vieira et al., 2019), Neuregulin-1 (Farkas  
490 et al., 2016), or Anterior Gradient (Kumar, Godwin, Gates, Garza-Garcia, & Brockes, 2007).  
491 Although the AEC is no longer present during the post-blastema stages of growth, nerves could  
492 both generate and induce the expression of similar growth promoting factors in the late-staged  
493 regenerating tissues. Future studies will focus on identifying the molecular mechanism of  
494 neurotrophic regulation of size during limb regeneration.

495

#### 496 *Conclusion*

497 This study provides foundational knowledge on the later stages of limb regeneration to  
498 understand the how size and proportionality becomes reestablished in a continually growing  
499 system. Our data indicates that nerve signaling plays an instructive role in determining regenerate  
500 size, and future studies will focus on identifying the molecular mechanism of size regulation.  
501 Furthermore, our data suggests that there is an upstream driver of size regulation, potentially in  
502 the DRG's endogenous environment or from the CNS. Lastly, as previously stated, our studies  
503 have not ruled out the likely intrinsic factors involved in size regulation. In total, there are still many  
504 unknowns, both up and downstream of nerve signaling, that must be resolved to fully understand



505 how size and proportionality become reestablished during axolotl limb regeneration. Furthermore,  
506 as regenerative medicine seeks to tap back into the developmental mechanism in order to regrow  
507 a fully functional limb, it will be important to study size regulation in multiple species to identify the  
508 shared mechanisms regulating this process.

509

## 510 **Materials and Methods:**

### 511 Animal Husbandry and Surgeries

512 Ethical approval for this study was obtained from the Institutional Animal Care and Use Committee  
513 at the University of Massachusetts Boston (Protocol # IACUC2015004) and all experimental  
514 undertakings were conducted in accordance with the recommendations in the Guide for the Care  
515 and Use of Laboratory Animals of the National Institutes of Health. Axolotls (*Ambystoma*  
516 *mexicanum*) were spawned either at the University of Massachusetts Boston or the Ambystoma  
517 Genetic Stock Center at the University of Kentucky. Experiments were performed on white-strain  
518 (RRID: AGSC\_101J), GFP-strain (RRID: AGSC\_110J), and RFP-strain (RRID: AGSC\_112J)  
519 Mexican axolotls (*Ambystoma mexicanum*). Animal sizes are measured snout to tail tip and  
520 described in the text for each experiment. They were housed in 40% Holtfreeters on a 14/10-hour  
521 light/dark cycle and fed *ad libitum*. Animals were fed every day or three times a week depending  
522 on the size of the animal. Animals were anesthetized in 0.1% MS222 prior to surgery or imaging.  
523 Live images were obtained using a Zeiss Discovery V8 Stereomicroscope with an Axiocam 503  
524 color camera and Zen software (Zeiss, Oberkochen, Germany).

525

526 To generate large and small animals, larval animals were either housed at 19°C or 4°C, which  
527 slows their growth rate. Animals were grown at these temperatures until their body lengths were  
528 approximately two-fold different, at which point the smaller animals were moved to 19°C for two  
529 weeks prior to any surgical manipulation.

530

531 Animal Measurements:

532 When measuring limb length and body length to determine limb proportionality and growth during  
533 regeneration, limbs were measured from the trunk/limb interception to the elbow and from the  
534 elbow to the longest digit tip (Supplemental Figure 1). Body length was measured from snout to  
535 tail tip. All measurements were taken in centimeter (cm; Supplemental Figure 1). Measurements  
536 were recorded prior to experimentation and weekly following surgical manipulation. After 5 weeks  
537 measurements were biweekly, and after 10 weeks they were taken triweekly.

538

539 Limb Amputations and Staging of Tiny Limbs:

540 Forelimb amputations are done mid-stylopod (mid-humerus). If the bone protruded from the  
541 amputation plane after contraction of the skin and muscle, it was trimmed back to make a flat  
542 amputation plane.

543

544 Limb regeneration stages were determined through an observation of patterning and growth rates.  
545 Limbs were considered in the “early tiny limb” stage when they reached the mid-digit stage of  
546 patterning (Iten & Bryant, 1973). Prior to this, they are considered in the “blastema” stage of limb  
547 regeneration. The transition from “early tiny limb” to “late tiny limb” is determined by a statistically  
548 significant decrease in limb length growth rate (cm/day). The regenerating limb is fully  
549 regenerated when the growth rate is no longer statistically significant from the unamputated  
550 control limbs.

551

552 Limb Denervation Surgeries:

553 Denervation of limbs was done by making a posterior incision on the flank, at the base of the arm,  
554 and severing and removing a piece of the three nerve bundles that come from spinal nerves 3, 4,  
555 and 5, proximal to the brachial plexus. A 2-3mm piece of the nerve bundle was cut out in an effort

556 to delay the regeneration of the nerves into the regenerates. Partial denervations were also  
557 performed by severing 1, 2, or all three of the limb nerve bundles.

558

559 1/3 denervations were performed by severing spinal nerve 5. 2/3 denervations were performed  
560 by severing spinal nerves 4 and 5. Full denervations were performed by severing all three nerves.  
561 Mock denervations were also performed by creating the same incision on the posterior side of the  
562 limb and dissecting the nerve bundles as in a typical denervation but leaving the nerve bundles  
563 intact. Because limb denervation last approximately 7 days before nerves begin to re-innervate  
564 the limb, experimental limbs were analyzed 4 days post denervation.

565

#### 566 Accessory Limb Model (ALM)/ Blastema Grafting:

567 Limbs on large (average 12 cm snout to tail tip) and small (average 6 cm snout to tail tip) GFP+  
568 donor axolotls were amputated mid-stylopod and allowed to regenerate until mid-bud stage. At  
569 that stage, they were amputated along with approximately 2mm stump tissue, and grafted onto a  
570 regenerative permissive environment on large (12cm snout to tail tip) RFP+ host axolotls or small  
571 (6cm snout to tail tip) white host axolotls. Stump tissue was included in the graft to ensure the  
572 ectopic limb is composed primarily of donor animal cells, since stump cells contribute to the  
573 regenerate (Currie et al., 2016). The regenerative permissive environment on the large hosts was  
574 created by removing an anterior patch of full thickness skin from the stylopod and deviating a limb  
575 nerve bundle to the wound site (Endo et al., 2004, McCusker & Gardiner 2013). The blastemas  
576 on the large donor animals were substantially larger than the limbs of the small host animals,  
577 making it impossible to perform this test on the small limbs. Thus, a regenerative permissive  
578 environment on the small host axolotl was generated by removing a patch of full thickness skin  
579 from flank of the animal posterior to the forelimb. The limb nerve bundle is dissected from the limb  
580 and deviated to the flank wound site on the small animal. After the blastemas are grafted on to  
581 the host wound sites, hosts are kept on ice and misted frequently for one hour, permitting

582 attachment of the graft.

583

#### 584 Neural-Modified Accessory Limb Model:

585 We developed the neural-modified ALM assay to determine if non-neural extrinsic factors were  
586 contributing to size regulation. In the NM-ALM the nerve source and host environment are  
587 decoupled by grafting a limb Dorsal Root Ganglia (DRG) from a donor animal in lieu of the  
588 deviated nerve bundle from the host animal into the wound site, as in the standard ALM surgery.  
589 Anterior wounds are created on white strain host animals. Limb DRGs were carefully extracted  
590 postmortem from GFP+ donor animals and implanted below the proximal skin surrounding the  
591 wound site (Figure 6A). The limb axon bundle is positioned in the middle of the wound site (Figure  
592 6A). Mid-bud staged blastemas, along with approximately 2mm of stump tissue, were amputated  
593 from white strain donor animals and immediately grafted onto the DRG nerve bundle and wound  
594 site on the host animals. Animals were kept on ice and moist for two hours following grafting to  
595 ensure attachment of the graft.

596

597 In the NM-ALM experiment reported here, we used large (average 14 cm snout to tail tip) and  
598 small (average 7 cm snout to tail tip) GFP+ and white strain siblings, generated by crossing  
599 heterozygous GFP parents, as blastema donors, DRG donors, and NM-ALM hosts. DRGs from  
600 both large and small GFP+ donor animals were dissected postmortem and grafted into anterior  
601 limb wound sites on large and small white host animals (Figure 6C). Mid-bud staged blastemas  
602 from small white strain donors were then grafted onto the NM-ALM.

603

#### 604 Tissue Histology and Immunofluorescence

605 Tissues were fixed overnight at 4°C in 4% formaldehyde (RICCA Chemical Company, Arlington,  
606 TX), decalcified in 10% EDTA (VWR, Radnor, PA) for 5-14 days depending on tissue size,  
607 rehydrated in 30% sucrose for 2 days, and embedded in Tissue-Tek OCT Compound (Sakura,

608 Torrance, CA). The OCT blocks were then flash frozen in liquid nitrogen and stored at -20°C.  
609 They were cryo-sectioned on a Leica CM 1950 (Leica Biosystems, Buffalo Grove, IL) through the  
610 mid zeugopod at 7µm thickness. Following staining, histological stained slides were mounted  
611 using Permount Mounting Medium (Thermo Fischer Scientific, Waltham, MA). VECTASHIELD  
612 Antifade Mounting Medium (Vector Laboratories, Burlingame, CA) was used to mount coverslips  
613 on the fluorescently stained slides. Sections were imaged on the Zeiss Observer.Z1 at 20x  
614 magnification. Tile scans were taken of the entire tissue section and then stitched together using  
615 the ZenPro software (Zeiss).

616

617

#### 618 Quantification of Cell Proliferation and Cell Death:

619 For analysis of cell proliferation in the limbs, 100ng of EdU (Roche, Basel, Switzerland) was  
620 injected into the intraperitoneal space on the flank of the animal. The limbs were then collected  
621 exactly four hours after injection and prepared for staining. Harvested tissues were process for  
622 cryo-sectioning as described above. The Roche Click-It EdU kit was used, following manufactures  
623 protocol, and co-stained with DAPI (1:1000 dilution – Sigma Aldrich, St. Louis, MO). The Roche  
624 *In Situ* cell death detection kit (Fluorescein) was used to analyze apoptosis using the  
625 manufactures' protocol. TUNEL stained sections were also co-stained with DAPI to obtain percent  
626 cell death. Using the opensource FIJI software, the number of either proliferating (EdU+) or dying  
627 (TUNEL+) cells and DAPI+ cells were counted and used to calculate the labeling indices for each.  
628 In each section, the tissues were visually separated based on morphology into three basic  
629 categories; epidermal, skeletal (bone or cartilage), and soft tissue (all other tissue), and the  
630 labeling indices were generated for each separately. Three technical (3 sections per limb), and at  
631 least three biological replicates were performed for each sample.

632

633

634 Quantification of Cell Size and ECM Size:

635 The quantification of average cell size and extra cellular area were performed separately on the  
636 entire epidermal, muscle, and skeletal tissues in each tissue section. The epidermal and muscle  
637 tissues were identified based on morphology in Wheat Germ Agglutinin (WGA - Thermo Fischer  
638 Scientific), Rhodamine phalloidin (Thermo Fischer Scientific), and DAPI (1:1000 dilution – Sigma  
639 Aldrich) stained sections. Skeletal tissues (bone or cartilage) were identified in sections stained  
640 with Harris Hematoxylin (Sigma Aldrich), Eosin Y (Thermo Fischer Scientific), and Alcian Blue  
641 (Sigma Aldrich). To measure the average cell size of epidermis and muscle in the fluorescent  
642 images, the area within WGA plasma membrane-stained cells, where the nucleus was observed  
643 (DAPI signal), was quantified using the FIJI software and averaged (Supplemental Figure 2A).  
644 While muscle cells are elongated syncytial cells, our measurements only quantified a cross-  
645 sectional area. For the skeletal elements, the average cell area was quantified by measuring the  
646 area of Alcian blue negative areas in the element that contained a nucleus (Supplemental Figure  
647 3A).

648  
649 To analyze ECM size for the epidermis and muscle, the area of all WGA internal cell spaces (with  
650 and without DAPI) were quantified. For skeletal tissue, the area of the Alcian blue negative cell  
651 spaces were quantified. The sum of these areas was calculated to obtain the “total cellular area”.  
652 The area of the complete tissue “total tissue area” was then quantified (Supplemental Figure 3B).  
653 Since the tissue sizes can vary, percent ECM was determined through the following equation:

$$\text{Percent ECM Deposition} = \frac{\text{Total Tissue Area} - \text{Total Cellular Area}}{\text{Total Tissue Area}} \times 100$$

654

655

656 Innervation Staining:

657 Innervation analysis was done on regenerating limb and flank sections to quantify innervation  
658 abundance using the Mouse Monoclonal Anti-Acetylated Tubulin antibody (1:200 dilution – Sigma

659 Aldrich), followed by the Goat-Anti-Mouse IgG Alexa Fluor 488 (1:200 dilution – Abcam,  
660 Cambridge, MA) secondary antibody. They were co-stained with Rhodamine phalloidin and DAPI  
661 as a general tissue stain, and to provide positional context for the location of the axon bundles.  
662 Limb innervation abundance was quantified by determining the percentage of limb area that is  
663 innervated (area of Anti-Acetylated Tubulin staining). To determine limb-bound axon bundle size,  
664 the sum of the area of axon bundles from DRGs 3, 4, and 5 were quantified as they emerged from  
665 the skeletal muscle surrounding the spine (Supplemental Figure 6A-B).

666

667 **Acknowledgments:** The authors wish to thank Dr. Kellee Siegfried Harris, her lab members, and  
668 the members of the McCusker lab for their insightful comments during the development of this  
669 project.

670

671 **Funding:** This work was supported by funding from the National Institute of Childhood Health to  
672 C.M. (Grant number: 0R15HD092180-01A1) and the Doctoral Dissertation Research Grant from  
673 University of Massachusetts Boston to K.W. Neither funding sources were involved in the study  
674 design, data collection and interpretation, or the decision to submit the work for publication.

675

676 **Competing Interests:** The authors have no competing interests.

677

678 **References:**

679 Bain, J. R., DeMatteo, C., Gjertsen, D., Packham, T., Galea, V., & Harper, J. A. (2012). Limb  
680 length differences after obstetrical brachial plexus injury: a growing concern. *Plastic and*  
681 *Reconstructive Surgery*, 130(4), 558e-571e.

682 <https://doi.org/10.1097/PRS.0b013e318262f26b>

683 Blackiston, D. J., McLaughlin, K. A., & Levin, M. (2009). Bioelectric controls of cell proliferation:  
684 ion channels, membrane voltage and the cell cycle. *Cell Cycle*, 8(21), 3527–3536.

- 685 <https://doi.org/10.4161/cc.8.21.9888>
- 686 Boersma, B., & Wit, J. M. (1997). Catch-up growth. *Endocrine Reviews*, 18, 646–661.
- 687 <https://doi.org/10.1210/edrv.18.5.0313>
- 688 Bogin, B., & Varela-Silva, M. I. (2010). Leg length, body proportion, and health: A review with a  
689 note on beauty. *International Journal of Environmental Research and Public Health*, 7(3),  
690 1047–1075. <https://doi.org/10.3390/ijerph7031047>
- 691 Brockes, J. P. (1984). Mitogenic growth factors and nerve dependence of limb regeneration.  
692 *Science*, 225(4668), 1280-1287. <https://doi.org/10.1126/science.6474177>
- 693 Brockes, J. P., & Kintner, C. R. (1986). Glial growth factor and nerve-dependent proliferation in  
694 the regeneration blastema of urodele amphibians. *Cell*, 45(2), 301-306.  
695 [https://doi.org/10.1016/0092-8674\(86\)90394-6](https://doi.org/10.1016/0092-8674(86)90394-6)
- 696 Bryant, D. M., Sousounis, K., Farkas, J. E., Bryant, S., Thao, N., Guzikowski, A. R., Monaghan,  
697 J. R., Levin, M., & Whited, J. L. (2017). Repeated removal of developing limb buds  
698 permanently reduces appendage size in the highly-regenerative axolotl. *Developmental*  
699 *Biology*, 424(1), 1–9. <https://doi.org/10.1016/j.ydbio.2017.02.013>
- 700 Bryant, P. J., & Simpson, P. (1984). Intrinsic and extrinsic control of growth in developing  
701 organs. *The Quarterly Review of Biology*, 59(4), 387–415. <https://doi.org/10.1086/414040>
- 702 Cerrato, F., Eberlin, K. R., Waters, P., Upton, J., Taghinia, A., & Labow, B. I. (2013).  
703 Presentation and treatment of macrodactyly in children. *The Journal of Hand Surgery*,  
704 38(11), 2112–2123. <https://doi.org/10.1016/j.jhsa.2013.08.095>
- 705 Conlon, I., & Raff, M. (1999). Size control in animal development. *Cell*, 96(2), 235–244.
- 706 Currie, J. D., Kawaguchi, A., Traspas, R. M., Schuez, M., Chara, O., & Tanaka, E. M. (2016).  
707 Live Imaging of Axolotl Digit Regeneration Reveals Spatiotemporal Choreography of  
708 Diverse Connective Tissue Progenitor Pools. *Developmental Cell*, 39(4), 411–423.  
709 <https://doi.org/10.1016/j.devcel.2016.10.013>
- 710 Daane, J. M., Lanni, J., Rothenberg, I., Seebohm, G., Higdon, C. W., Johnson, S. L., & Harris,



- 711 M. P. (2018). Bioelectric-calcineurin signaling module regulates allometric growth and size  
712 of the zebrafish fin. *Scientific Reports*, 8(1), 1–9. [https://doi.org/10.1038/s41598-018-](https://doi.org/10.1038/s41598-018-28450-6)  
713 28450-6
- 714 Endo, T., Bryant, S. V., & Gardiner, D. M. (2004). A stepwise model system for limb  
715 regeneration. *Developmental Biology*, 270(1), 135–145.  
716 <https://doi.org/10.1016/j.ydbio.2004.02.016>
- 717 Farkas, J. E., Freitas, P. D., Bryant, D. M., Whited, J. L., & Monaghan, J. R. (2016). Neuregulin-  
718 1 signaling is essential for nerve-dependent axolotl limb regeneration. *Development*,  
719 143(15), 2724–2731. <https://doi.org/10.1242/dev.133363>
- 720 Farkas, J. E., & Monaghan, J. R. (2017). A brief history of the study of nerve dependent  
721 regeneration. *Neurogenesis*, 4(1), e1302216.  
722 <https://doi.org/10.1080/23262133.2017.1302216>
- 723 Fredriks, A. M., Van Buuren, S., Van Heel, W. J. M., Dijkman-Neerincx, R. H. M., Verloove-  
724 Vanhorick, S. P., & Wit, J. M. (2005). Nationwide age references for sitting height, leg  
725 length, and sitting height/height ratio, and their diagnostic value for disproportionate growth  
726 disorders. *Archives of Disease in Childhood*, 90(8), 807–812.  
727 <https://doi.org/10.1136/adc.2004.050799>
- 728 Frykman, G. K., & Wood, V. E. (1978). Peripheral nerve hamartoma with macrodactyly in the  
729 hand: Report of three cases and review of the literature. *The Journal of Hand Surgery*,  
730 3(4), 307–312. [https://doi.org/10.1016/S0363-5023\(78\)80029-X](https://doi.org/10.1016/S0363-5023(78)80029-X)
- 731 Gerber, T., Murawala, P., Knapp, D., Masselink, W., Schuez, M., Hermann, S., Gac-Santel, M.,  
732 Nowoshilow, S., Kageyama, J., Khattak, S., Currie, J. D., Camp, J. G., Tanaka, E. M., &  
733 Treutlein, B. (2018). Single-cell analysis uncovers convergence of cell identities during  
734 axolotl limb regeneration. *Science*, 362(6413). <https://doi.org/10.1126/science.aaq0681>
- 735 Harrison, R. G. (1924). Some Unexpected Results of the Heteroplastic Transplantation of  
736 Limbs. *Proceedings of the National Academy of Sciences*, 10(2), 69–74.

- 737 <https://doi.org/10.1073/pnas.10.2.69>
- 738 Holder, N. (1981). Regeneration and compensatory growth. *British Medical Bulletin*, 37(3).
- 739 <https://doi.org/10.1093/oxfordjournals.bmb.a071707>
- 740 Iten, L. E., & Bryant, S. V. (1973). Forelimb Regeneration from Different Levels of Amputation in  
741 the Newt , *Notophthalmus viridescens*: Length , Rate , and Stages. *Wilhelm Roux's*  
742 *Archives of Developmental Biology*, 173, 263–282. <https://doi.org/10.1007/bf00575834>
- 743 Keenan, S. R., & Beck, C. W. (2016). Xenopus Limb bud morphogenesis. *Developmental*  
744 *Dynamics*, 245(3). <https://doi.org/10.1002/dvdy.24351>
- 745 Kumar, A., Delgado, J.-P., Gates, P. B., Neville, G., Forge, A., & Brockes, J. P. (2011). The  
746 aneurogenic limb identifies developmental cell interactions underlying vertebrate limb  
747 regeneration. *Proceedings of the National Academy of Sciences of the United States of*  
748 *America*, 108(33), 13588–13593. <https://doi.org/10.1073/pnas.1108472108>
- 749 Kumar, A., Godwin, J. W., Gates, P. B., Garza-Garcia, A. A., & Brockes, J. P. (2007). Molecular  
750 basis for the nerve dependence of limb regeneration in an adult vertebrate. *Science*,  
751 318(5851), 772–777. <https://doi.org/10.1126/science.1147710>
- 752 Kumar, A., Nevill, G., Brockes, J. P., & Forge, A. (2010). A comparative study of gland cells  
753 implicated in the nerve dependence of salamander limb regeneration. *Journal of Anatomy*,  
754 217(1), 16–25. <https://doi.org/10.1111/j.1469-7580.2010.01239.x>
- 755 Labow, B. I., Pike, C. M., & Upton, J. (2016). Overgrowth of the hand and upper extremity and  
756 associated syndromes. *The Journal of Hand Surgery*, 41(3), 473-82-quiz 482.  
757 <https://doi.org/10.1016/j.jhsa.2015.08.012>
- 758 Leever, S. J., Weinkove, D., MacDougall, L. K., Hafen, E., & Waterfield, M. D. (1996). The  
759 *Drosophila* phosphoinositide 3-kinase Dp110 promotes cell growth. *The EMBO Journal*,  
760 15(23), 6584–6594. <https://doi.org/10.1002/j.1460-2075.1996.tb01049.x>
- 761 Lehrberg, J., & Gardiner, D. M. (2015). Regulation of axolotl (*Ambystoma mexicanum*) limb  
762 blastema cell proliferation by nerves and BMP2 in organotypic slice culture. *PLOS ONE*,

- 763 10(4), e0123186. <https://doi.org/10.1371/journal.pone.0123186>
- 764 Levin, M. (2012). Morphogenetic fields in embryogenesis, regeneration, and cancer: Non-local  
765 control of complex patterning. *BioSystems*, 109(3).  
766 <https://doi.org/10.1016/j.biosystems.2012.04.005>
- 767 Makanae, A., Mitogawa, K., & Satoh, A. (2014). Co-operative Bmp- and Fgf-signaling inputs  
768 convert skin wound healing to limb formation in urodele amphibians. *Developmental*  
769 *Biology*, 396(1), 57–66. <https://doi.org/10.1016/j.ydbio.2014.09.021>
- 770 McCusker, C., Bryant, S. V., & Gardiner, D. M. (2015). The axolotl limb blastema: cellular and  
771 molecular mechanisms driving blastema formation and limb regeneration in tetrapods.  
772 *Regeneration*, 2(2), 54-71. <https://doi.org/10.1002/reg2.32>
- 773 McCusker, C., & Gardiner, D. M. (2013). Positional information is reprogrammed in blastema  
774 cells of the regenerating limb of the Axolotl (*Ambystoma mexicanum*). *PLOS One*. 8(9).  
775 DOI: 10.1371/journal.pone.0077064
- 776 Michalopoulos, G. K. (2007). Liver Regeneration. *Journal Cellular Physiology*, 213(May), 286–  
777 300. <https://doi.org/10.1002/JCP>
- 778 Mullen, L. M., Bryant, S. V, Torok, M. A., Blumberg, B., & Gardiner, D. M. (1996). Nerve  
779 dependency of regeneration: the role of Distal-less and FGF signaling in amphibian limb  
780 regeneration. *Development*, 122, 3487–3497.
- 781 Nacu, E., Gromberg, E., Oliveira, C. R., Drechsel, D., & Tanaka, E. M. (2016). FGF8 and SHH  
782 substitute for anterior-posterior tissue interactions to induce limb regeneration. *Nature*,  
783 533(7603), 407–410. <https://doi.org/10.1038/nature17972>
- 784 Nieuwkoop, P. D., & Faber, J. (1958). Normal Table of *Xenopus Laevis* (Daudin). *Copeia*,  
785 1958(1). <https://doi.org/10.2307/1439568>
- 786 Penzo-Mendez, A. I., & Stanger, B. Z. (2015). Organ-size regulation in mammals. *Cold Spring*  
787 *Harbor Perspectives in Biology*, 7(9), 1-12. <https://doi.org/10.1101/cshperspect.a019240>
- 788 Perathoner, S., Daane, J. M., Henrion, U., Seebohm, G., Higdon, C. W., Johnson, S. L.,

- 789 Nüssein-Volhard, C., & Harris, M. P. (2014). Bioelectric signaling regulates size in  
790 zebrafish fins. *PLOS Genetics*, *10*(1), e1004080.  
791 <https://doi.org/10.1371/journal.pgen.1004080>
- 792 Satoh, A, Graham, G. M. C., Bryant, S. V., & Gardiner, D. M. (2008). Neurotrophic regulation of  
793 epidermal dedifferentiation during wound healing and limb regeneration in the axolotl  
794 (*Ambystoma mexicanum*). *Developmental Biology*, *319*(2), 321–335.  
795 <https://doi.org/10.1016/j.ydbio.2008.04.030>
- 796 Satoh, A, Makanae, A., Nishimoto, Y., & Mitogawa, K. (2016). FGF and BMP derived from  
797 dorsal root ganglia regulate blastema induction in limb regeneration in *Ambystoma*  
798 *mexicanum*. *Developmental Biology*, *417*(1), 114–125.  
799 <https://doi.org/10.1016/j.ydbio.2016.07.005>
- 800 Singer, M. (1946). The nervous system and regeneration of the forelimb of adult *Triturus*. V. The  
801 influence of number of nerve fibers, including a quantitative study of limb innervation.  
802 *Journal of Experimental Zoology Part A: Ecological Genetics and Physiology*, *101*(3), 299–  
803 337.
- 804 Singer, M. (1952). The Influence of the Nerve in Regeneration of the Amphibian Extremity. *The*  
805 *Quarterly Review of Biology*, *27*(2), 169–200.
- 806 Singer, M. (1978). On the nature of the Neurotrophic phenomenon in urodele limb regeneration.  
807 *Integrative and Comparative Biology*, *18*(4), 829–841. <https://doi.org/10.1093/icb/18.4.829>
- 808 Singer, M., & Inoue, S. (1964). The nerve and the epidermal apical cap in regeneration of the  
809 forelimb of adult *Triturus*. *Journal of Experimental Zoology Part A: Ecological Genetics and*  
810 *Physiology*, *155*(1), 105–115. <https://doi.org/10.1002/jez.1401550108>
- 811 Stanger, B. Z. (2008). Organ size determination and the limits of regulation. *Cell Cycle*, *7*(3),  
812 318-324. <https://doi.org/10.4161/cc.7.3.5348>
- 813 Stocker, H., & Hafen, E. (2000). Genetic control of cell size. *Current Opinion in Genetics &*  
814 *Development*, *10*(5), 529–535.

- 815 Taylor, A. C. (1943). Development of the innervation pattern in the limb bud of the frog. *The*  
816 *Anatomical Record*, 87(4). <https://doi.org/10.1002/ar.1090870409>
- 817 Tsuge, K. & Ikuta, Y. (1973) Macroductyly and fibro-fatty proliferation of the median nerve.  
818 *Hiroshima J Med Science*, 22(1): 83-101.
- 819 Twitty, V. C., & Schwind, J. L. (1931). The growth of eyes and limbs transplanted  
820 heteroplastically between two species of *Amblystoma*. *Journal of Experimental Zoology*  
821 *Part A: Ecological Genetics and Physiology*, 59(1), 61–86.  
822 <https://doi.org/10.1002/jez.1400590105>
- 823 Vieira, W. A., Wells, K. M., Raymond, M. J., De Souza, L., Garcia, E., & McCusker, C. D.  
824 (2019). FGF, BMP, and RA signaling are sufficient for the induction of complete limb  
825 regeneration from non-regenerating wounds on *Ambystoma mexicanum* limbs.  
826 *Developmental Biology*, 451(2), 146-157. <https://doi.org/10.1016/J.YDBIO.2019.04.008>
- 827 Williams, J. (1981). Catch-up growth. *Journal of Experimental Morphology*, 65, 89–101.
- 828 Yntema, C. (1959). Regeneration in sparsely innervated and aneurogenic forelimbs of  
829 *Ambystoma* larvae. *Journal of Experimental Zoology*, 140(1), 101–123.
- 830 Ziegler-Graham, K., MacKenzie, E. J., Ephraim, P. L., Travison, T. G., & Brookmeyer, R. (2008).  
831 Estimating the prevalence of limb loss in the United States: 2005 to 2050. *Archives of*  
832 *Physical Medicine and Rehabilitation*, 89(3), 422–429.  
833 <https://doi.org/10.1016/j.apmr.2007.11.005>
- 834
- 835
- 836
- 837
- 838
- 839
- 840

841 **Supplemental Figures:**

842

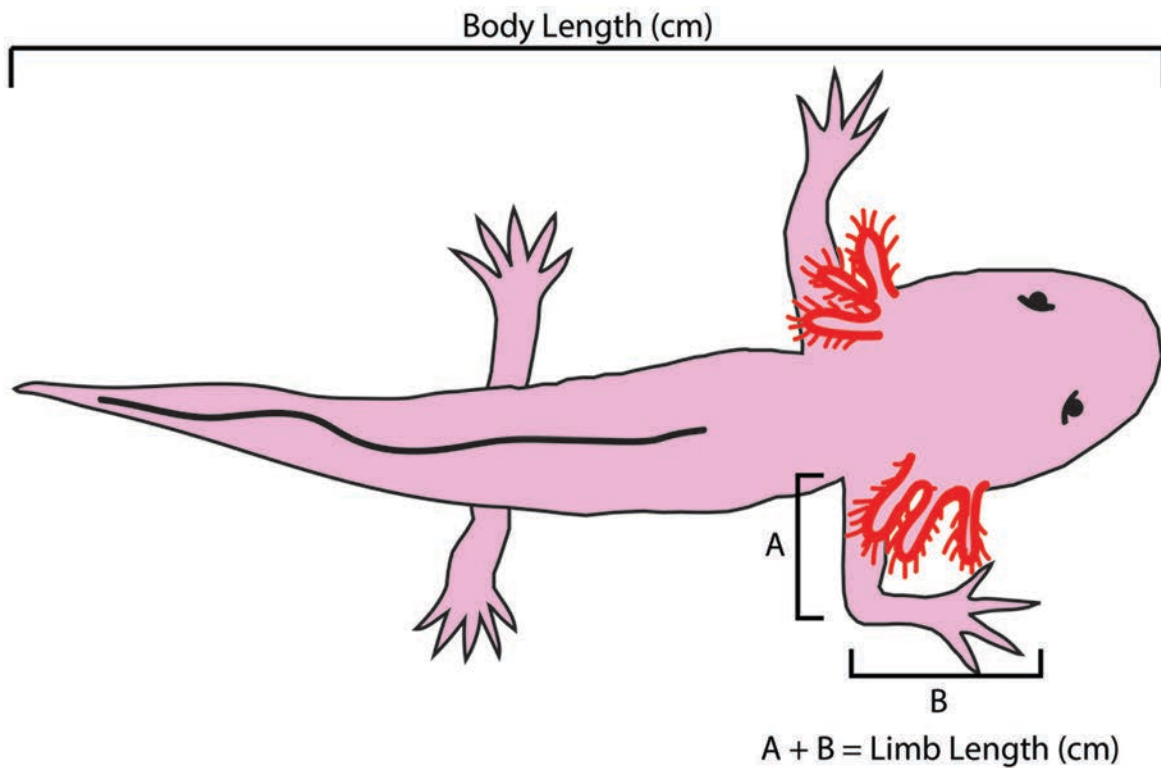

843

844 **Supplemental Figure 1: Axolotl Size measurements:** Body Length is measured from snout to  
845 tail tip. Limb length is measured by measuring from the limb/trunk junction to the elbow (A) and  
846 then from the elbow to the tip of the longest digit (B). All measurements are recorded in centimeter  
847 (cm).

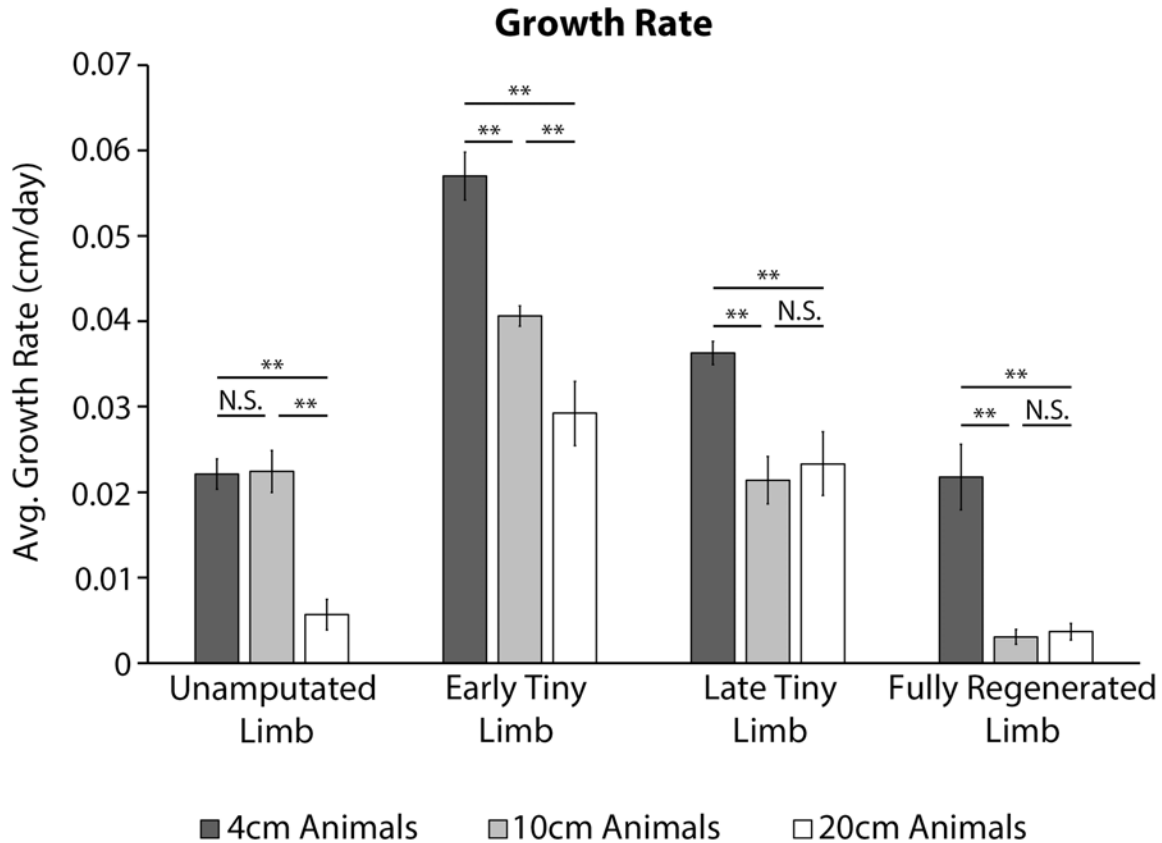

848

849

850 **Supplemental Figure 2: Animal size corresponds with growth rate during limb**  
851 **regeneration.** Limb growth rates over the first 7 days of each growth phase were quantified using  
852 limb length measurements on unamputated limbs, early tiny limbs, late tiny limbs, and fully  
853 regenerated limbs of 4cm (n=20), 10cm (n=10), and 20cm animals (n=10). The body length  
854 represents their size at the time of amputation. Error bars=SEM. P-values calculated by ANOVA  
855 and the Tukey Post-hoc test. \*=p<0.05 \*\*=p<0.005.

856

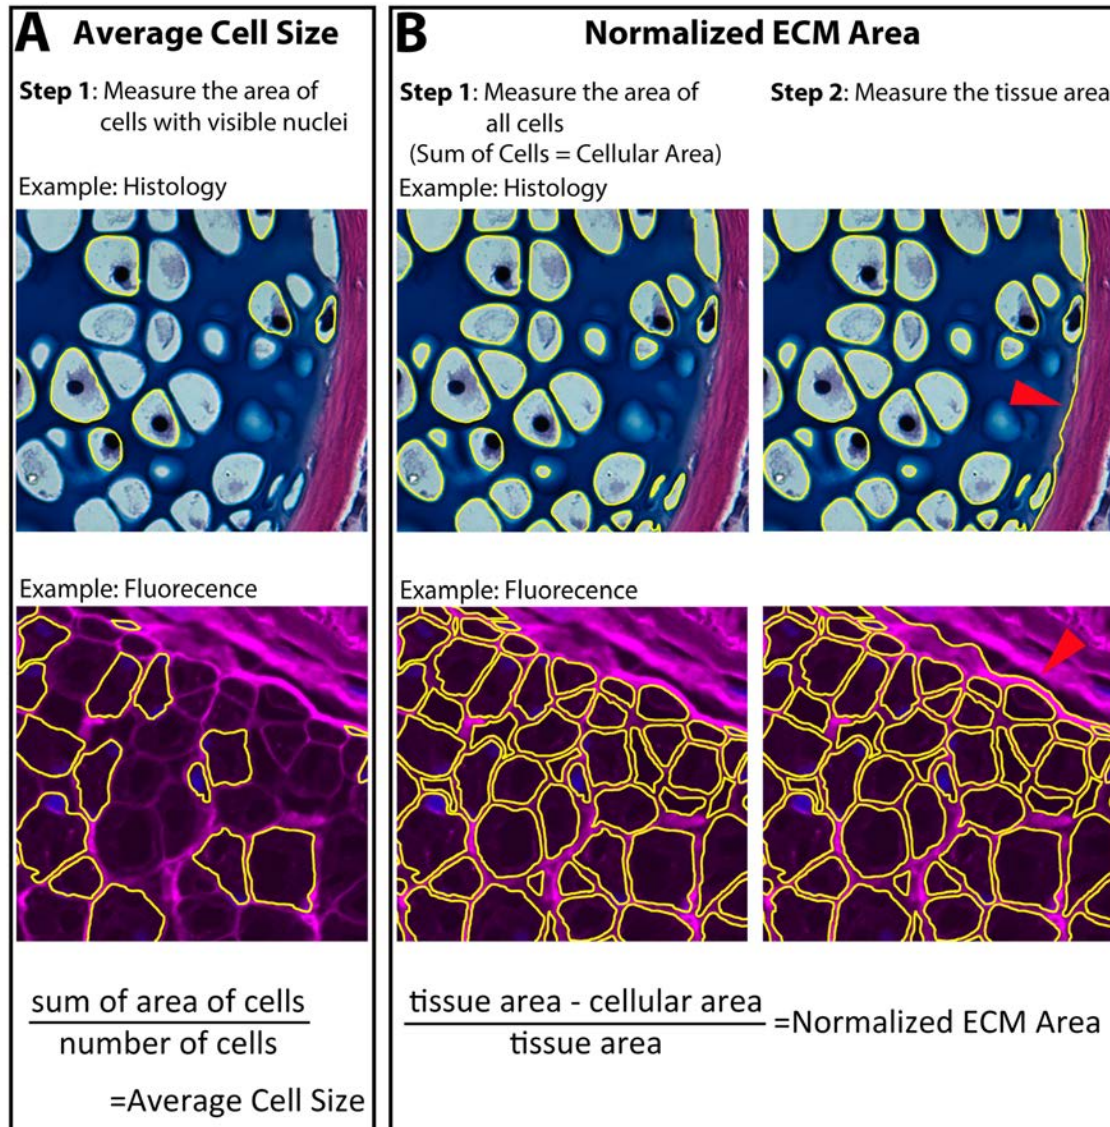

857

858 **Supplemental Figure 3: Measurement of cell and ECM size.** Cell size and ECM area were  
859 quantified using 7µm cross sections through the zeugopod. Skeletal tissue was analyzed using  
860 the histology stain of hematoxylin, eosin, and Alcian blue. The epidermis and muscle  
861 (represented) were analyzed using fluorescent stains of Wheat Germ Agglutinin (WGA - magenta)  
862 and DAPI (blue). A) Average cell size was quantified by measuring the area of nucleated cells. B)  
863 Normalized ECM area was quantified by finding the sum of all the cellular area in a tissue. The  
864 sum was then subtracted from the total tissue area (red arrow indicating tissue boarder) and  
865 divided by the total tissue area to provide the normalized ECM area.



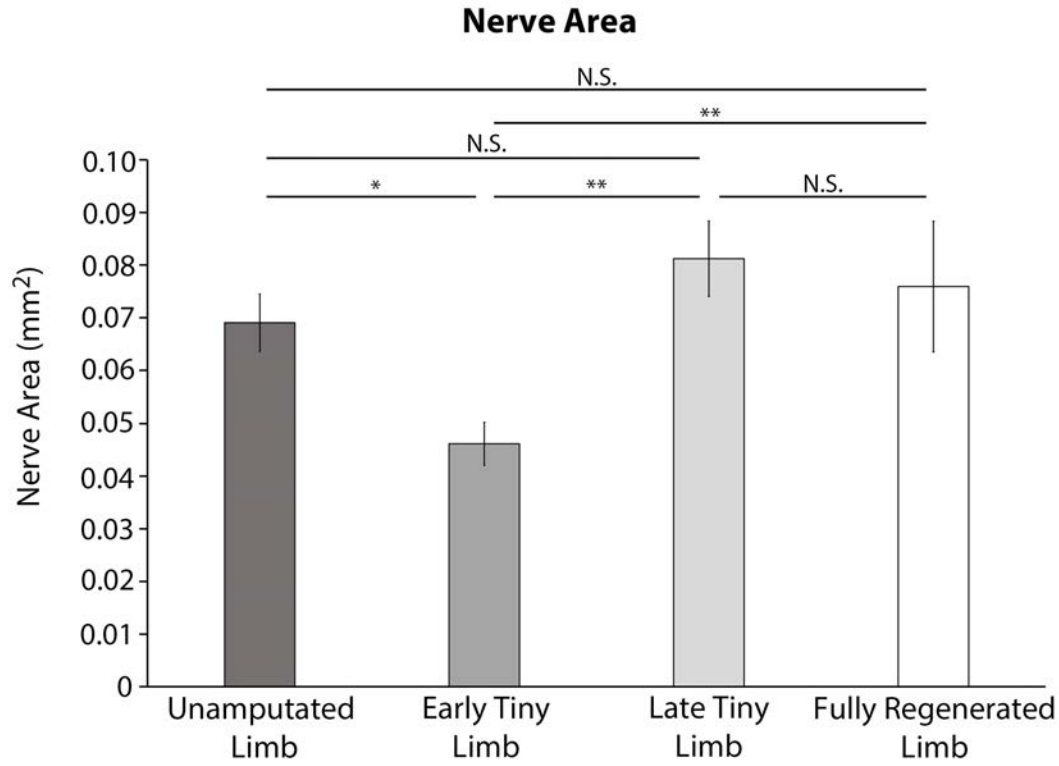

866

867 **Supplemental Figure 4: The tiny limb staged regenerate is hyperinnervated.** Total nerve  
868 area was quantified from transvers limb sections of unamputated limbs, early tiny limbs, late tiny  
869 limbs, and fully regenerated limbs (n=5). Error bars = SEM. P-values calculated by ANOVA and  
870 the Tukey Post-hoc test. \*=p<0.05 \*\*=p<0.005.

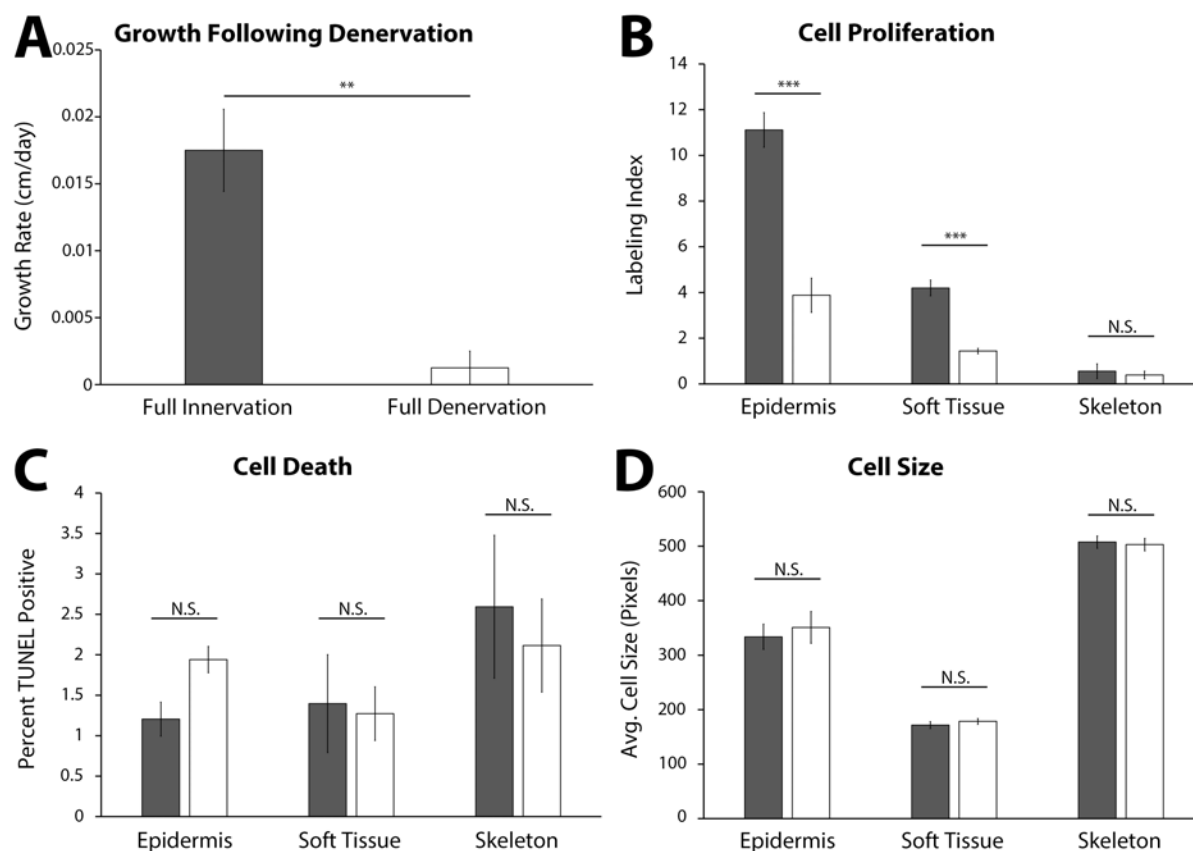

871

872 **Supplemental Figure 5: Growth of the late tiny limb requires nerve signaling for cell**  
873 **proliferation.** Amputated limbs were permitted to regenerate to the late tiny limb stage, at which  
874 point they underwent either a mock denervation (dark grey, n=5) or a full denervation (white, n=5).  
875 The limbs were collected and analyzed 4 days post denervation for growth rate (A), cell  
876 proliferation (B), cell death (C), and cell size (D) as previously described. Error bars = SEM. P-  
877 values calculated by Paired T-Test. \*\*=p<0.005 \*\*\*=p<0.0005.

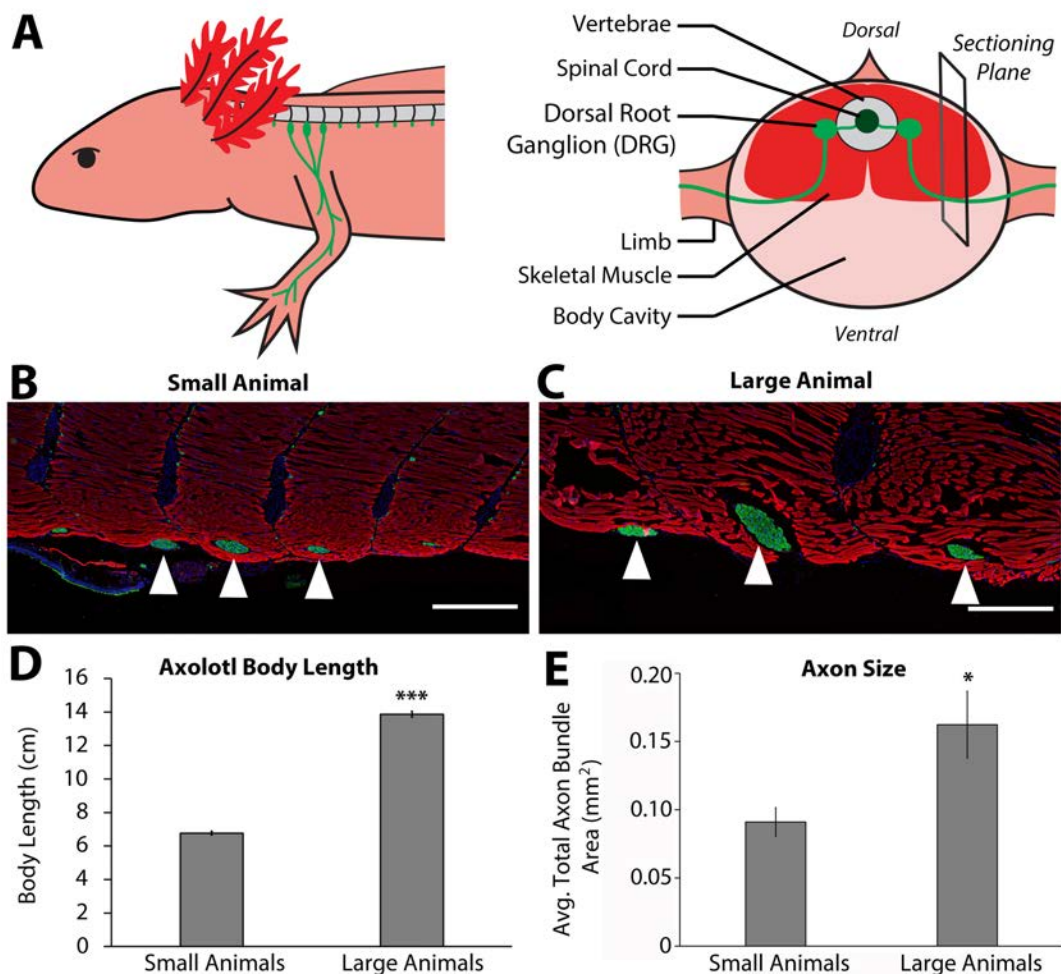

878

879 **Supplemental Figure 6: Innervation area increases with animal size.** A) Three spinal DRGs  
880 (3, 4, and 5, light green) extend through the spinal skeletal muscle (red) and enter the limb. The  
881 right panel shows that the sectioning plane for B and C is located at the point where the limb-  
882 bound axon bundles emerge from the skeletal muscle. B-C) Representative immunofluorescent  
883 images of sections where the limb axon bundles (anti-acetylated tubulin antibodies – green) are  
884 emerging from the skeletal muscle (rhodamine phalloidin - red) and co stained with DAPI (blue)  
885 in both small (n=4, B) and large (n=3, C) animals. Scale bars = 500 $\mu$ m. White triangles indicate  
886 limb-bound axon bundles from DRGs 3, 4, and 5 (from left to right). D) Body length, snout to tail  
887 tip was measured on small (n=4) and large (n=3) animals, and the average length is represented  
888 in the graph. E) The cross-sectional area of the nerve bundles was quantified in millimeters  
889 squared, and the averages of the sum of the three axon bundles are represented in E. The large  
890 animals (n=3) have a significantly larger cross-sectional area than the small animals (n=4). Error  
891 bars=SEM. P-values calculated by T-tests. \* $p < 0.05$  \*\*\* $p < 0.0005$ .

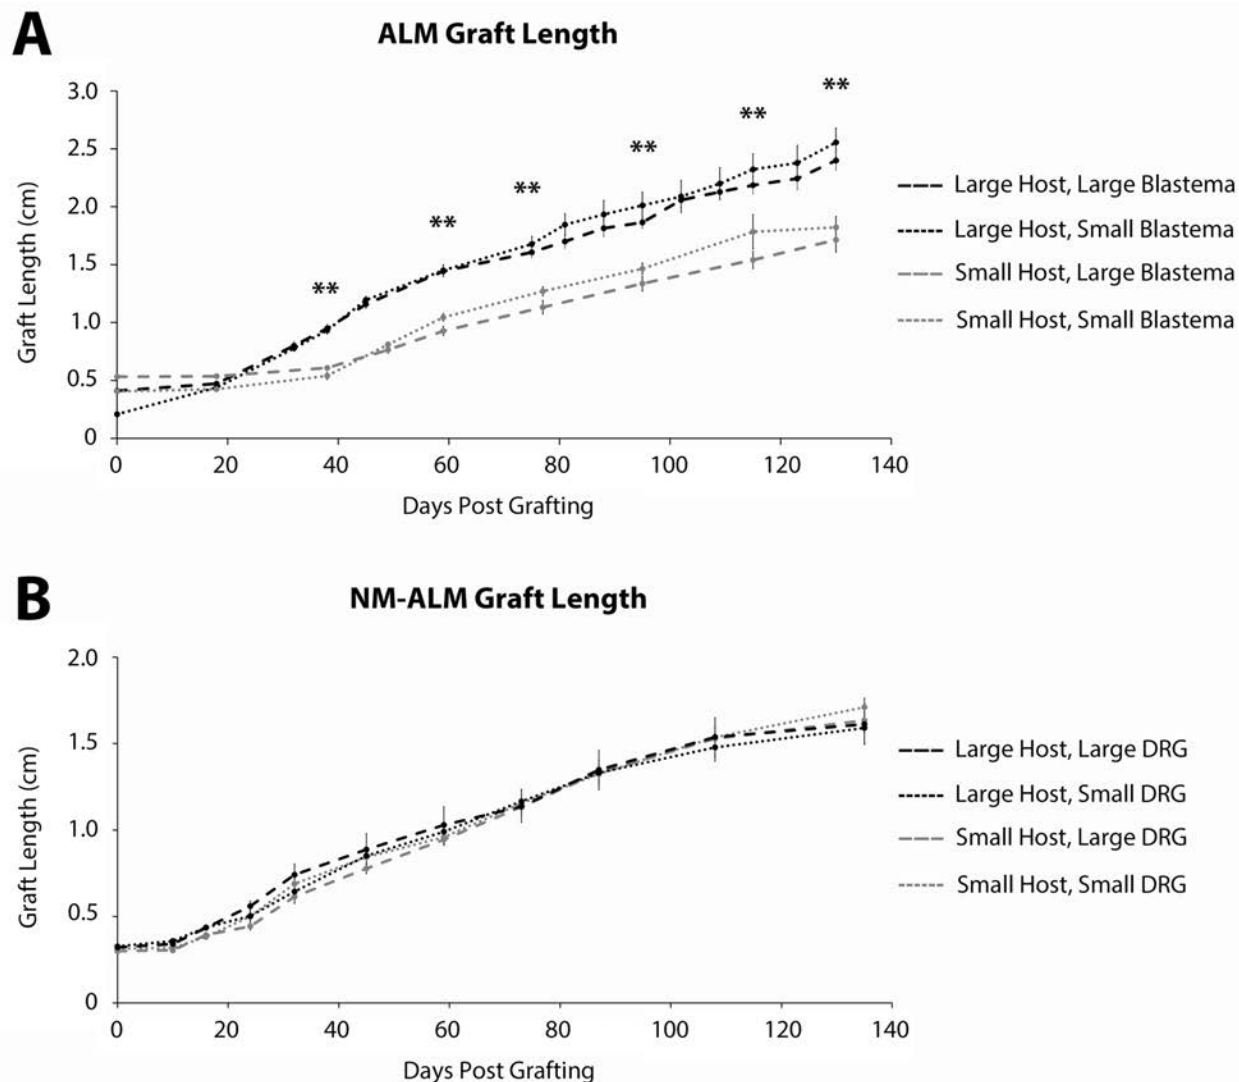

892

893 **Supplemental Figure 7: Growth of grafted limbs in ALMs and NM-ALMs.** A) The ectopic limbs  
894 on the large and small host animals, generated from large and small blastema donor animals via  
895 traditional ALM surgery, were measured overtime from 0 to 130 days post grafting. B) The ectopic  
896 limbs on the large and small host animals, generated from large and small DRG donor animals  
897 via NM-ALM surgery, were measured overtime from 0 to 135 days post grafting. Error Bars =  
898 SEM. P-values calculated by ANOVA and the Tukey Post-hoc test. \*\*= $p < 0.005$ . Statistical  
899 comparisons were made between the limbs on the differently sized host animals.
